1  
2  
3  
4  
5  
6  
7  
8  
9  
10  
11  
12  
13  
14  
15  
16  
17  
18  
19  
20  
21

**Inflammatory stress signaling via NF- $\kappa$ B alters accessible cholesterol to upregulate SREBP2 transcriptional activity in endothelial cells**

Joseph W. Fowler, Rong Zhang, Bo Tao, Nabil E. Boutagy and William C. Sessa

Vascular Biology and Therapeutics Program, Department of Pharmacology, Yale University School of Medicine, 10 Amistad Street, New Haven, CT 06520, USA

Corresponding author: Dr. William C. Sessa, Department of Pharmacology, Vascular Biology and Therapeutics Program, Yale University School of Medicine, 10 Amistad Street, New Haven, CT 06520, E-mail: [william.sessa@yale.edu](mailto:william.sessa@yale.edu).

22 **Abstract**

23           There is a growing appreciation that a tight relationship exists between cholesterol  
24 homeostasis and immunity in leukocytes, however, this relationship has not been deeply explored  
25 in the vascular endothelium. Endothelial cells (ECs) rapidly respond to extrinsic signals, such as  
26 tissue damage or microbial infection, by upregulating factors to activate and recruit circulating  
27 leukocytes to the site of injury and aberrant activation of ECs leads to inflammatory based  
28 diseases, such as multiple sclerosis and atherosclerosis. Here, we studied the role of cholesterol  
29 and its master regulator, SREBP2, in the EC responses to inflammatory stress. Treatment of ECs  
30 with pro-inflammatory cytokines upregulates SREBP2 cleavage and cholesterol biosynthetic gene  
31 expression within the late phase of the acute inflammatory response. Furthermore, SREBP2  
32 activation was dependent on NF- $\kappa$ B DNA binding and canonical SCAP-SREBP2 processing.  
33 Mechanistically, inflammatory activation of SREBP was mediated by a reduction in accessible  
34 cholesterol, leading to heightened sterol sensing and downstream SREBP2 cleavage. Detailed  
35 analysis of NF- $\kappa$ B inducible genes that may impact sterol sensing resulted in the identification of  
36 a novel *RELA*-inducible target, *STARD10*, that mediates accessible cholesterol homeostasis in  
37 ECs. Thus, this study provides an in-depth characterization of the relationship between  
38 cholesterol homeostasis and the acute inflammatory response in EC.

39

## 40 **Introduction**

41           The majority of the biological processes regulating acute inflammation has focused on  
42 the contribution of tissue-infiltrating leukocytes. Undoubtedly, leukocytes are crucial for host  
43 defense and tissue repair, regulating the balance between resolution and chronic inflammation.  
44 However, the endothelium plays a significant role in the overall inflammatory response,  
45 particularly in initiation and vascular maintenance. Endothelial cells (ECs) are in constant  
46 contact with the bloodstream and rapidly change their phenotype in response to inflammatory  
47 stimuli. Inflammatory cytokines, such as tumor necrosis factor alpha (TNF $\alpha$ ) and interleukin-1  
48 beta (IL1 $\beta$ ), bind to their respective receptors to activate I- $\kappa$ -kinase, which phosphorylates and  
49 degrades inhibitory I $\kappa$ B $\alpha$  and releases the key inflammatory transcription factor, NF- $\kappa$ B, to the  
50 nucleus (DiDonato *et al.*, 1997). NF- $\kappa$ B, along with other activated transcription factors, such as  
51 activator protein 1 (AP1) upregulate the transcription of several inflammatory response genes  
52 that increase (1) vascular permeability, (2) leukocyte chemoattraction, and (3) immune cell  
53 adhesion and extravasation into tissue (Pober and Sessa, 2007). Indeed, the vascular  
54 endothelium is a primary sensor of the circulating bloodstream and is exposed to various stimuli  
55 that regulate systemic host defense responses.

56           It is becoming increasingly appreciated that there exists a connection between cellular  
57 immunity and cholesterol. Cellular lipid and cholesterol homeostasis are tightly regulated by the  
58 master regulator sterol response element binding factor (SREBP). At sufficient cellular  
59 cholesterol levels, SREBP is retained as a full-length protein in the endoplasmic reticulum (ER)  
60 bound to adaptor proteins SREBP cleavage-activating protein (SCAP) and inhibitory insulin-  
61 induced gene (INSIG) (Brown and Goldstein, 1997). When cellular cholesterol levels decrease,  
62 the SCAP-SREBP complex translocates to the Golgi where SREBP is proteolytically cleaved by  
63 proteases, S1P and S2P. Cleavage results in the release of the N-terminal fragment of SREBP  
64 into the cytoplasm, which translocates to the nucleus to bind to DNA and initiate gene

65 transcription. SREBP1a and SREBP1c isoforms predominantly activate the expression of genes  
66 involved in fatty acid synthesis and the SREBP2 isoform upregulates genes that increase  
67 cellular cholesterol by de novo synthesis and exogenous uptake (Horton *et al.*, 2002).

68       The relationship between SREBP2, cholesterol homeostasis, and immune phenotype  
69 has been predominantly studied in leukocyte immunobiology. First, it has been suggested  
70 SREBP2 directly modulates immune responses. In macrophages, it was found that the  
71 SCAP/SREBP2 shuttling complex directly interacts with the NLRP3 inflammasome and  
72 regulates inflammasome activation via translocation from ER to Golgi (Guo *et al.*, 2018).  
73 Another group found that SREBP2 was highly activated in macrophages treated with TNF $\alpha$  and  
74 that nuclear SREBP2 bound to inflammatory and interferon response target genes to promote  
75 an M1-like inflammatory state (Kusnadi *et al.*, 2019). Second, several studies have shown that  
76 cellular cholesterol levels control immune phenotype. Type I interferon (IFN) signaling in  
77 macrophages decreases cholesterol synthesis, allowing for activation of STING on the ER to  
78 feed forward and enhance IFN signaling (York *et al.*, 2015). Furthermore, decreasing  
79 cholesterol synthesis via *Srebf2* knockout was sufficient to activate the type I IFN response.  
80 Mevalonate, an intermediate in the cholesterol biosynthetic pathway, can regulate trained  
81 immunity in monocytes. Patients lacking mevalonate kinase accumulate mevalonate and  
82 develop hyper immunoglobulin D syndrome (Bekkering *et al.*, 2018). On the other hand, studies  
83 have indicated that bacterial lipopolysaccharide (LPS) or type I IFNs can actively suppress  
84 synthesis of cholesterol in macrophages and that restoring cholesterol biosynthesis promotes  
85 inflammation (Araldi *et al.*, 2017; Dang *et al.* 2017).

86       Despite the importance of the endothelium in the inflammatory response, the link  
87 between inflammation and cholesterol homeostasis is not well studied in ECs. There is evidence  
88 that increased activation of SREBP2 and cholesterol loading in ECs are pro-inflammatory, but  
89 these studies were largely focused on models of atherosclerosis and did not focus on the  
90 mechanism of activation, flux of the discrete pools of cholesterol and/or sterol sensing in ECs

91 (Xiao *et al.*, 2013; Westerterp *et al.*, 2016). Here we show an intimate relationship between  
92 inflammatory signaling and cholesterol homeostasis in EC. Tumor necrosis factor  $\alpha$  (TNF $\alpha$ )  
93 rapidly activates NF- $\kappa$ B resulting in a time-dependent activation of SREBP2 and SREBP2  
94 dependent gene expression. The activation of SREBP occurs via TNF mediated stimulation of  
95 NF- $\kappa$ B and changes in the accessible cholesterol pool that promote sterol sensing but not via  
96 other post-translational mechanism. Mechanistically, we show that TNF $\alpha$  induction of the NF- $\kappa$ B  
97 inducible gene, *STARD10*, in part, mediates the changes in accessible cholesterol leading to  
98 heightened SREBP activation. Thus, EC respond to inflammatory cytokine challenges by  
99 reducing the accessible cholesterol pool on the plasma membrane thereby inducing canonical  
100 SREBP processing and gene expression leading to inflammation.

101

102 **Results**

103 **TNF $\alpha$  and RELA transcriptionally regulate canonical SREBP-dependent gene expression**

104 Primary HUVEC were treated with TNF $\alpha$  (10ng/mL) for 4 and 10 hr followed by RNA-seq  
105 analysis to uncover the transcriptional changes at peak and later stages of activation,  
106 respectively. As both a positive control and exploratory aim, we performed RNA sequencing on  
107 HUVEC treated with TNF $\alpha$  at similar timepoints after RNAi-mediated knockdown of *RELA*,  
108 which encodes the protein P65, the key DNA-binding component of the canonical NF $\kappa$ B  
109 transcriptional complex. Treatment of HUVEC for 10 hr with TNF $\alpha$  resulted in significant  
110 upregulation of 913 genes and downregulation of 2202 genes ( $p < 0.05$ ;  $-1.5 > \text{Fold Change}$   
111  $(F.C) > 1.5$ ) (Fig. 1a) and *RELA* knockdown decreased expression of 1067 genes and increased  
112 expression of 1112 genes (Fig. 1b). As expected, *RELA* gene expression was the most  
113 significantly gene decreased after knockdown.

114 Ingenuity Pathway Analysis (IPA) revealed that TNF $\alpha$  treatment for 4hr resulted in the  
115 upregulation of several expected pathways reported in literature, including inflammation, TNFR  
116 signaling, and activation of IRF (Fig. 1 – Figure Supplement 1 a) (Hogan *et al.* 2017). These  
117 pathways were also significantly upregulated in HUVEC treated after 10 hr of TNF $\alpha$  treatment  
118 (Fig. 1c). Interestingly, Canonical Pathway Analysis uncovered the “Superpathway of  
119 Cholesterol Biosynthesis” as the second most significant pathway upregulated in the 10 hr  
120 treatment group. Furthermore, Upstream Regulator analysis restricted to transcription factors  
121 predicted that SREBF1 was significantly activated in these cells. Metacore analysis of metabolic  
122 networks and GSEA hallmark analysis similarly revealed significant upregulation of the  
123 cholesterol homeostasis pathway at the 10 hr timepoint (Fig. 1 – Figure Supplement 1 b and c).

124 RNA-seq pathway analysis of genes reduced after *RELA* knockdown in HUVEC treated  
125 with TNF $\alpha$  (10hr) revealed that expected inflammatory pathways, such as interferon signaling  
126 and neuroinflammation, were significantly inhibited when *RELA* was not present (Fig. 1d).

127 Additionally, the “Superpathway of Cholesterol Biosynthesis” and several other redundant  
128 pathways populated the most significant Canonical Pathway results. Upstream transcription  
129 regulator analysis predicted SREBP2 and SREBP1 were significantly decreased in *RELA*  
130 knockdown cells. An analysis of gene set overlap between genes significantly upregulated after  
131 TNF $\alpha$  treatment and genes significantly downregulated in TNF $\alpha$ -treated cells lacking *RELA*  
132 revealed that SREBP2 target genes were significantly overrepresented (Fig. 1 – Figure  
133 Supplement 1 d). We decided to focus on the SREBP2 pathway in late phase (10hr) of TNF $\alpha$ -  
134 treated cells because of the overwhelming prevalence of cholesterol biosynthesis genes that  
135 were increased and significantly attenuated when *RELA* was knocked down (Fig. 1e).

### 136 **TNF $\alpha$ increases SREBP2 cleavage and transcription of downstream gene targets**

137 RNA-seq analysis predicted that SREBP2 was highly activated in HUVEC treated with  
138 TNF $\alpha$ . SREBP2 becomes transcriptionally active when its N-terminal DNA-binding fragment is  
139 proteolytically processed in the Golgi and allowed to enter the nucleus (Sakai *et al.*, 1996). This  
140 process can be assayed by measuring precursor (P) and cleaved (C) SREBP2 at 150kDa and  
141 65kDa on a Western Blot, respectively (Hua *et al.*, 1995). Measurement of SREBP2(C)  
142 throughout a 16 hr timecourse revealed that SREBP2 cleavage began as early as 6 hr after  
143 TNF $\alpha$  treatment and peaked at 10 hr (Fig. 2a). Furthermore, SREBP2 activation was dose-  
144 dependently induced by TNF $\alpha$  in HUVEC cultured in either sterol-sufficient fetal bovine serum  
145 (FBS) or in lipoprotein depleted serum (LPDS) (Fig. 2 – Figure Supplement 1 a).

146 We next measured the relative mRNA abundance of NF- $\kappa$ B and SREBP2 target genes  
147 throughout the same time course. As expected, known NF- $\kappa$ B target genes, such as *ICAM1*,  
148 *SELE*, and *CXCL1* were rapidly induced after TNF $\alpha$  treatment, with many increasing several  
149 hundred-fold in less than 2 hr (Fig 2b, top). The patterning of SREBP2 target gene expression  
150 was notably several hrs later than NF- $\kappa$ B dependent gene expression. A majority of the  
151 canonical SREBP2 genes, including *LDLR*, *HMGCR*, and *HMGCS1* significantly increased as

152 early as 6 hr after treatment and peaked at around 8-10 hr (Fig 2b, bottom). Unlike a majority of  
153 the cholesterol biosynthesis genes, several fatty acid synthesis genes known to be SREBP1-  
154 dependent, such as *ACACA/B*, *FASN*, and *GPAM* did not significantly increase with  $\text{TNF}\alpha$   
155 treatment and were unaffected by *RELA* knockdown (Fig. 2 – Figure Supplement 1 b).

156 To further test if SREBP2 activity increased after  $\text{TNF}\alpha$  stimulation, we measured the  
157 protein levels of low-density lipoprotein receptor (LDLR), a well-known target of SREBP2 target  
158 and receptor involved in the uptake of exogenous lipoproteins, such as low-density lipoprotein  
159 (LDL) (Briggs *et al.*, 1993). HUVEC were treated overnight in LPDS with or without the addition  
160 of 25 $\mu\text{g}/\text{mL}$  LDL, to suppress SREBP2 cleavage and LDLR expression (Fig. 2c). LDL treatment  
161 decreased LDLR protein levels in HUVEC at rest and  $\text{TNF}\alpha$  significantly increased LDLR levels  
162 in HUVEC cultured in both LPDS and LPDS+LDL. Exogenous LDL was also able to partially  
163 suppress LDLR expression, indicating that this process is sterol-sensitive. Similar results were  
164 found for another well-known SREBP2 target of cholesterol biosynthesis, HMGCR (Fig. 2 –  
165 Figure Supplement 2 c). Next, we tested fluorescently labeled LDL uptake as a functional  
166 readout of the increase in LDLR as quantified by flow cytometry. Similar to what was seen by  
167 immunoblotting,  $\text{TNF}\alpha$  treatment led to increased Dil-LDL uptake into cells pre-incubated in  
168 various degrees of sterol enriched media (Fig. 2d).

### 169 **NF- $\kappa$ B activation and DNA binding are necessary for cytokine-induced SREBP2 cleavage**

170  $\text{TNF}\alpha$  activates several signaling cascades to fully activate resting endothelial cells that  
171 leads to a change in phenotype to promote inflammation. For canonical NF- $\kappa$ B signaling,  $\text{TNF}\alpha$   
172 activates the immediate post-translational activation of the NF- $\kappa$ B complex via phosphorylation  
173 and degradation of the inhibitory molecule I $\kappa$ B $\alpha$  by I- $\kappa$ -kinase (IKK) isoforms (DiDonato *et al.*,  
174 1997). However,  $\text{TNF}\alpha$  has been shown to upregulate several other signaling pathways, such  
175 as JNK, p38, and ERK1/2 (Aggarwal, 2003). Therefore, we sought to confirm that NF- $\kappa$ B  
176 signaling is necessary for SREBP2 activation in ECs undergoing inflammatory stress. Treatment



177 of HUVEC with  $\text{TNF}\alpha$ ,  $\text{IL1}\beta$ , and lipopolysaccharide (LPS) to activate  $\text{NF-}\kappa\text{B}$  through separate  
178 pathways led to an increase in SREBP2 cleavage and upregulation of LDLR levels (Fig. 3a) with  
179 concomitant increases in ICAM1 as a positive control. Furthermore, pre-treatment of HUVEC  
180 with the transcription inhibitor, Actinomycin D (ActD), blunted activation of SREBP2, LDLR and  
181 ICAM1 in response to  $\text{TNF}\alpha$  (Fig. 3b). This indicated that the mechanism by which inflammatory  
182 cytokines activate SREBP2 is most likely through the transcription of novel regulatory molecules  
183 rather than via post-translational modifications and/or processing.

184 Lastly, we measured  $\text{TNF}\alpha$ -mediated SREBP2 activation after chemical inhibition and  
185 genetic knockdown of  $\text{NF-}\kappa\text{B}$  to confirm previous RNA-seq results. Treatment of HUVEC with  
186 BAY 11-7082, a selective IKK inhibitor, significantly attenuated  $\text{IL1}\beta$  and  $\text{TNF}\alpha$  induced increase  
187 in SREBP2 cleavage, LDLR protein levels, and mRNA expression of SREBP2-dependent genes  
188 (Fig. 3c, 3d) (Keller, *et al.* 2000). Notably, BAY 11-7082 did not suppress JNK or p38 signaling,  
189 demonstrating specificity for the  $\text{NF-}\kappa\text{B}$  pathway (Fig 3c). Western Blot analysis of SREBP2 in  
190 HUVEC after *RELA* knockdown confirmed that  $\text{NF-}\kappa\text{B}$  DNA-binding and transcriptional activity  
191 are required for cytokine induction of SREBP2 cleavage (Fig. 3e).

### 192 **Canonical SCAP/SREBP2 shuttling is required for $\text{TNF}\alpha$ -mediated SREBP2 cleavage**

193 Studies have shown that SREBP2 cleavage can be controlled by mechanisms beyond  
194 the SCAP shuttling complex, such as Akt/mTOR/Lipin1 regulation of nuclear SREBP and direct  
195 cleavage of SREBP in the ER by S1P (Shimano and Sato, 2017; Kim *et al.*, 2018). It is possible  
196 that a post-translational SREBP2 regulator could be the *RELA*-dependent molecule responsible  
197 for increased SREBP2 activation. Furthermore, it is also feasible that the *SREBF2* gene itself is  
198 under the control of  $\text{NF-}\kappa\text{B}$ , which would upregulate total SREBP2 and increase the threshold of  
199 cholesterol needed to suppress its cleavage. Interestingly, this has been reported in a previous  
200 study for *SREBF1* (Im *et al.*, 2011). Thus, we used several SREBP-processing inhibitors to test

201 if the SCAP-mediated translocation and Golgi cleavage are necessary for SREBP2 activation in  
202 cytokine stimulated EC (Fig. 4a).

203         Upon sensing heightened cellular cholesterol, SCAP stabilizes SREBP in the ER and  
204 prevents its translocation to the Golgi for processing (Brown and Goldstein, 1997). Therefore,  
205 we treated HUVEC with two forms of exogenous cholesterol to test if SCAP shuttling lies  
206 upstream of SREBP2 activation in our system: [1] free cholesterol bound to the donor molecule  
207 methyl- $\beta$ -cyclodextrin (Chol) and [2] cholesterol-rich LDL. Chol significantly attenuated the  
208 increased LDLR and SREBP2 cleavage seen with TNF $\alpha$  stimulation (Fig 4b). Furthermore, LDL  
209 was able to dose-dependently decrease SREBP2 activation back down to basal levels at the  
210 highest concentration of 250 $\mu$ g/mL (Fig. 4c, Fig. 4 – Figure Supplement 1 a). Similar results  
211 were seen when SCAP was inhibited with a chemical inhibitor, fatostatin (Fig. 4 – Figure  
212 Supplement 1 b). To solidify this point, siRNA knockdown of SCAP inhibited the ability of IL1 $\beta$   
213 and TNF $\alpha$  to upregulate SREBP2 cleavage, but not ICAM1 induction (Fig. 4d).

214         Next, we sought to inhibit SREBP2 processing by two complimentary approaches,  
215 INSIG1-mediated retention in the ER and inhibition of Golgi processing. The oxysterol 25-  
216 hydroxycholesterol (25HC) will promote association of INSIG to the SCAP/SREBP2 complex  
217 and prevent translocation to the Golgi (Radhakrishnan *et al.*, 2007). Treatment of HUVEC with  
218 25HC significantly prevented cytokine-induced SREBP2 activation and LDLR upregulation (Fig.  
219 4e, Fig. 4 – Figure Supplement c). We next treated the cells with PF-429242, a potent inhibitor  
220 of site-1-protease (S1P), which prevented SREBP2 cleavage and LDLR increase throughout the  
221 24 hr timecourse (Fig. 4f, Fig. 4 – Figure Supplement 1 d). The above biochemical experiments  
222 were supported by qPCR measurements of SREBP2-dependent genes to confirm that the  
223 inhibitors used in this study fully attenuated SREBP2 activity (Fig. 4g). As expected, *HMGCS1*  
224 mRNA was depleted basally by LDL, siSCAP, 25HC, and PF-042424 and these compounds  
225 prevented the increase in *HMGCS1* transcription in response to TNF $\alpha$ . *HMGCS1* transcript

226 levels represented the trend seen in several other sterol responsive genes. Although  $\text{TNF}\alpha$   
227 consistently increased *SREBF2* transcription, all inhibitors also were able to attenuate this  
228 upregulation of *SREBF2* mRNA. Taken together, the evidence suggests that canonical SCAP  
229 shuttling is necessary for activation of SREBP2 by inflammatory cytokines and that this is not  
230 due to direct NF- $\kappa$ B-mediated upregulation of the *SREBF2* transcript or cholesterol biosynthesis  
231 genes.

### 232 **Inflammatory stress decreases accessible free cholesterol required for SREBP** 233 **processing**

234         Since SCAP/SREBP2 shuttling is maintained when cells were treated with  $\text{TNF}\alpha$ , we  
235 reasoned that perhaps  $\text{TNF}\alpha$  regulates cellular cholesterol levels. Lipids were extracted from  
236 control and  $\text{TNF}\alpha$ -treated HUVEC and total cholesterol was measured. Incubation of cells in  
237 LPDS reduced cellular cholesterol compared to cells cultured in FBS. Cells treated with  
238 exogenous methyl- $\beta$ -cyclodextrin-cholesterol (Chol) contained significantly more measured  
239 cholesterol (Fig. 5a). However,  $\text{TNF}\alpha$  treatment did not alter total cholesterol in either media  
240 condition. Secondly, we quantified cellular cholesterol using mass spectrometry-based lipid  
241 analysis, a significantly more precise technique that provides information on molar percentages  
242 of lipid. Similar to the initial cholesterol measurements,  $\text{TNF}\alpha$  did not change total cholesterol  
243 after 4 or 10 hr of treatment (Fig. 5b).

244         Changes in the distribution of cholesterol could account for SREBP2 activation without  
245 loss in total cholesterol mass. Recently, several tools have been developed to analyze the  
246 exchangeable pool of free cholesterol that exists in flux between the ER and the plasma  
247 membrane and this accessible pool tightly regulates the shuttling of SCAP/SREBP2 (Infante  
248 and Radhakrishnan, 2017). Accessible cholesterol can be quantified using modified  
249 recombinant bacterial toxins that bind in a 1:1 molar ratio to accessible free cholesterol on the  
250 plasma membrane (Gay *et al.* 2015). To examine accessible cholesterol in EC, we purified His-

251 tagged anthrolysin O (ALOD4) and used it as a probe (Endapally *et al.* 2019). To assess the  
252 utility of the probe in HUVEC, cells were incubated with Chol, LDL or with methyl- $\beta$ -cyclodextrin  
253 (M $\beta$ CD, a cholesterol acceptor) and ALOD4 bound was quantified by probing for anti-HIS at  
254 15kDa by Western blotting. As expected, treatment with Chol or LDL increased ALOD4 binding,  
255 whereas M $\beta$ CD decreased ALOD4 binding (Fig. 4 – Figure Supplement 1 a). Secondly, a similar  
256 method was used, but instead of cell lysis, DyLight680-conjugated anti-HIS antibody was  
257 directly applied to the ALOD4-incubated cells and read live on LICOR Biosciences Odyssey CLx  
258 platform (In-Cell Western Blot). Likewise, the positive controls were able to tightly regulate  
259 ALOD4 binding and fluorescence signal (Fig. 4 – Figure Supplement 1 b).

260 TNF $\alpha$  treatment of HUVEC significantly decreased ALOD4 binding (Fig. 5c). Using In-  
261 Cell Western blotting, treatment with PF-429242 to reduce SREBP2 processing and its  
262 transcription decreased ALOD4 basally and, when combined with TNF $\alpha$ , significantly decreased  
263 accessible cholesterol even further (Fig. 5d). This suggests that the decrease in accessible  
264 cholesterol was independent of SREBP2 stability. Probing accessible cholesterol throughout an  
265 8 hr timecourse revealed that ALOD4 binding significantly decreased as early as 4 hr after  
266 TNF $\alpha$  treatment in HUVEC treated with and without PF-429242 (Fig. 5e). This was in line with  
267 previous results measuring SREBP2 cleavage and gene expression as accessible cholesterol  
268 depletion should precede SREBP2 activation. Moreover, *RELA* knockdown attenuated the  
269 decrease in accessible cholesterol, indicating that SREBP2 activation by NF- $\kappa$ B was most likely  
270 through upregulation of a molecule or pathway that decreases accessible cholesterol (Fig. 5f).

271 Lastly, we validated that inflammatory stress decreased accessible cholesterol not only  
272 in cultured HUVEC, but also in EC *in vivo*. We directly labeled ALOD4 with AlexaFluor 647 and  
273 incubated this probe with suspended HUVEC to validate the flow cytometry assay (Fig. 4 –  
274 Figure Supplement 1 c and d). Modulation of cholesterol with various treatments altered ALOD4  
275 binding as expected and treatment of HUVEC with TNF $\alpha$  revealed similar results to

276 immunoblotting (Fig. 4 – Figure Supplement 1 e and f). Next, we intraperitoneally injected  
277 wildtype C57BL/6J mice with a nonlethal dose of LPS at 15mg/kg to stimulate a systemic  
278 inflammatory response. Indeed, TNF $\alpha$  peaked in the serum of these animals 2 hr after injection  
279 (Fig. 4 – Figure Supplement 1 g). Lungs were harvested 6 hr after LPS injection and cells were  
280 broken up into a single-cell suspension for flow cytometry staining (Fig. 5g). Cd31+ ECs from  
281 mice treated with LPS contained about 20% less accessible cholesterol compared to ECs from  
282 untreated mice (Fig. 5h, 5i). Notably, total serum cholesterol remained unchanged in TNF $\alpha$ -  
283 treated animals compared to control, indicating that the decrease in accessible cholesterol  
284 reflects the effect of the inflammatory stimulus on ECs (Fig. 4 – Figure Supplement 1 h).

### 285 **STARD10 is necessary for full SREBP2 activation by TNF $\alpha$**

286 TNF $\alpha$  did not impact several canonical biological pathways that regulate the pool of  
287 accessible cholesterol. Briefly, cholesterol efflux, sphingomyelin shielding, esterification, and  
288 lysosomal/endosomal accumulation remained unchanged in ECs treated with TNF $\alpha$  (Fig. 5 –  
289 Figure Supplement 1). Therefore, we probed our RNA-seq dataset for genes that have been  
290 reported to regulate lipid dynamics and could possibly be upstream of the depletion in  
291 accessible cholesterol.

292 We specifically isolated genes that significantly increased after 4 or 10 hr TNF $\alpha$  treatment and  
293 decreased with *RELA* knockdown. We found several genes that perform various lipid-  
294 associated functions, such as direct lipid binding and transport (*STARD4*, *STARD10*, and  
295 *ABCG1*), free fatty acid enzymatic activation and transport (*ACSL3*, *DBI*), mediation of  
296 mitochondrial steroidogenesis (*DBI*, *ACBD3*, *NCEH1*), and metabolism of phospholipids  
297 (*SGPP2*, *PAPP2A*, and *PPAPP2B*) (Fig. 6a). Furthermore, several of these genes have been  
298 previously reported to have *RELA* bound to their respective promoters in ECs treated with IL1 $\beta$   
299 or TNF $\alpha$ , which supported the hypothesis that these genes were targets for NF- $\kappa$ B (Hogan *et*  
300 *al.*, 2017).

301 From these several targets identified by RNAseq, we identified *STARD10* as a promising  
302 upstream mediator of accessible cholesterol in ECs treated with inflammatory cytokines.  
303 *STARD10* belongs to a family of proteins that bind hydrophobic lipids via a structurally  
304 conserved steroidogenic acute regulatory-related lipid transfer (START) domain (Clark, 2020).  
305 *STARD* proteins regulate non-vesicular trafficking of cholesterol, phospholipids, and  
306 sphingolipids between membranes. *STARD10* was found to be upregulated by  $TNF\alpha$  after 4  
307 and 10 hr of treatment and inhibited by loss of *RELA* (Fig. 6b). *STARD4* also shared this  
308 expression pattern, however, it is a sterol-sensitive gene and its upregulation by  $TNF\alpha$  most  
309 likely occurred via SREBP2 activation (Breslow *et al.*, 2005). Analysis of publicly available *RELA*  
310 chromatin immunoprecipitation (ChIP) sequencing data revealed that the *STARD10* promoter  
311 contained a strong *RELA* binding peak in ECs treated with  $IL1\beta$  or  $TNF\alpha$  (Fig. 6c). *STARD10*  
312 has been shown to bind phosphatidylcholine (PC), phosphatidylethanolamine (PE), and  
313 phosphatidylinositol (PI), but much of its detailed biology remains unknown (Olayioye *et al.*,  
314 2005; Carrat *et al.* 2020). Although it has not been shown to directly bind cholesterol, *STARD10*  
315 may be implicated in the reorganization of membrane phospholipids that could alter cholesterol  
316 flux and shield cholesterol localization (Tabas, 2002; Mesmin and Maxfield, 2009; Lagace,  
317 2015).

318 We next knocked down *STARD10* to analyze its role in cholesterol homeostasis and EC  
319 inflammatory response. Treatment of ECs with two independent siRNAs targeting *STARD10*  
320 significantly decreased *STARD10* expression and attenuated the enhanced expression of  
321 SREBP2 target genes *HMGCS1*, *HMGCR*, and *LDLR* (Fig. 6d). Furthermore, *STARD10*  
322 knockdown significantly rescued the loss in accessible cholesterol that occurs with  $TNF\alpha$   
323 stimulation (Fig. 6e). SREBP2 activation and *LDLR* upregulation were also attenuated with  
324 *STARD10* silencing. Therefore, we have identified a novel *RELA*-inducible gene in ECs that  
325 mediates the cholesterol homeostasis in response to inflammatory stress.

## 326 **Discussion**

327 Little is known about cholesterol metabolism and homeostasis in ECs in the context of  
328 physiology or pathology. Here, we show that  $\text{TNF}\alpha$  and  $\text{IL-1}\beta$  induce a transcriptional response  
329 via  $\text{NF-}\kappa\text{B}$  that alters cholesterol homeostasis in ECs (Fig. 7). Accordingly, rapid changes in  
330 accessible cholesterol then activates SREBP2 processing to compensate for the altered flux of  
331 accessible cholesterol between the plasma membrane and ER. Importantly, we identified a  
332 novel  $\text{NF-}\kappa\text{B}$  inducible gene, *STARD10*, that serves as an intermediate bridging TNF activation  
333 to changes in accessible cholesterol and SREBP2 activation. Collectively, these data support  
334 the growing evidence for an intimate relationship between inflammatory signaling and  
335 cholesterol homeostasis.

336 Different forms of cellular stress have been shown to activate SREBP2 in multiple cell  
337 types, including oscillatory shear stress in ECs, ER stress in hepatocytes, and  $\text{TNF}\alpha$  in  
338 macrophages (Xiao *et al.*, 2013; Kim *et al.*, 2018; Kusnadi *et al.*, 2019). However, these studies  
339 did not implicate changes in cholesterol accessibility as an upstream mechanism leading to the  
340 activation of SREBP2. Here, we clearly demonstrate that activation of  $\text{NF-}\kappa\text{B}$  leads to changes  
341 in the accessible cholesterol pool promoting classical SREBP2 processing in a SCAP-  
342 dependent manner. Epithelial cells treated with  $\text{IFN}\gamma$ -stimulated macrophage conditioned media  
343 rapidly reduce accessible cholesterol to protect against bacterial infection by preventing  
344 cholesterol-mediated transport between cells (Abrams *et al.*, 2020). Similarly, macrophages  
345 deplete accessible cholesterol to protect against bacterial toxin-mediated injury (Zhou *et al.*,  
346 2020). In both of these studies, accessible cholesterol was mediated by  $\text{IFN}$ -induction of the  
347 enzyme, cholesterol 25-hydroxylase (Ch25H), which produces 25-HC as a product and  
348 enhances the esterification of cholesterol. However, Ch25H is not expressed ECs with or  
349 without  $\text{TNF}\alpha$  and cholesterol does not mobilize into the lipid droplet pool. Nonetheless, EC  
350 depletion of accessible cholesterol may be an evolutionary mechanism of host immunity.

351 In the present study, we show that TNF $\alpha$  activation of NF- $\kappa$ B, induces the expression of  
352 the gene, STARD10. Although little is known about the physiological function of STARD10, it  
353 may influence cholesterol homeostasis in several ways. Firstly, it has been reported that  
354 STARD10 can directly bind PC, PE, and PI and may alter intracellular membrane dynamics to  
355 influence the flux of cholesterol. It has been suggested PC plays a role in cholesterol  
356 sequestration either by steric hindrance from by its polar head group or through the creation of  
357 novel membranes that may sink cholesterol out of the accessible pool (Mesmin and Maxfield,  
358 2009; Lagace, 2015). Furthermore, STARD10 belongs to a classical family of lipid transporters  
359 and may bind lipids not previously reported. As a novel NF $\kappa$ B inducible gene, STARD10  
360 regulation of cholesterol homeostasis is a novel concept that warrants further investigation.

361 Previous studies indicate that SREBP2 activation feeds forward into the inflammatory  
362 response and exacerbates inflammatory damage. Firstly, SREBP2 has been shown to regulate  
363 inflammatory phenotype via modulation of cholesterol homeostasis. Increased cholesterol flux  
364 has been reported to feed into multiple immune pathways, such as interferon responses,  
365 inflammasome activation, and trained immunity (York *et al.*, 2015; Dang *et al.*, 2017; Bekkering  
366 *et al.*, 2018). Furthermore, perturbations in cellular cholesterol may change membrane  
367 dynamics and affect cellular signaling (Araldi *et al.*, 2017). Secondly, SREBP2 has been  
368 proposed to bind and promote transcription of several pro-inflammatory mediators, such as  
369 *IL1 $\beta$* , *IL8*, *NLRP3*, and *NOX2* (Kusnadi *et al.*, 2018; Xiao *et al.*, 2013; Yeh *et al.*, 2004). SREBP2  
370 binding to non-classical gene promoters may very well depend on cellular and epigenetic  
371 context. How SREBP2 feeds into post-translational inflammatory response phenotype of ECs,  
372 such as permeability, sensitivity to infection, and receptor signaling, remains to be explored.

373 This study extends a growing body of work identifying a tight relationship between  
374 cholesterol homeostasis, inflammation and immunity. Although we have shown EC response to  
375 inflammatory cytokines in the acute setting, much remains to be explored in the context of



376 chronic inflammation. Of particular interest, it has been well appreciated that the endothelium  
377 plays an important role in the progression of atherosclerosis. Chronic exposure to elevated  
378 lipoproteins causes accumulation of LDL in the subendothelial layer and activation of the  
379 endothelium (Libbey *et al.*, 2019). This leads to an inflammatory cascade that causes a cycle of  
380 leukocyte recruitment and inflammatory activation. In this pathological context, ECs are exposed  
381 to a unique microenvironment composed of relatively high concentrations of cholesterol and  
382 cytokines. Thus, elucidating how the endothelium in vivo responds to the loss of *Srebf2* in  
383 mouse models of acute and chronic inflammation will be important delineate the role of EC  
384 cholesterol homeostasis in vascular health and disease.  
385

## 386 **Materials and Methods**

### 387 Mammalian Cell Culture

388 HUVECs were obtained from the Yale School of Medicine, Vascular Biology and Therapeutics  
389 Core facility. Cells were cultured in EGM-2 media (Lonza) with 10% fetal bovine serum (FBS),  
390 penicillin/streptomycin and glutamine (2.8 mM) in a 37°C incubator with 5% CO<sub>2</sub> supply.

### 391 RNA Sequencing

392 RNA was isolated using the RNeasy Plus Kit (Qiagen) and purity of total RNA per sample  
393 was verified using the Agilent Bioanalyzer (Agilent Technologies, Santa Clara, CA). RNA  
394 sequencing was performed through the Yale Center for Genome Analysis using an Illumina  
395 HiSeq 2000 platform (paired-end 150bp read length). Briefly, rRNA was depleted from  
396 RNA using Ribo-Zero rRNA Removal Kit (Illumina). RNA libraries were generated from control  
397 cells using TrueSeq Small RNA Library preparation (Illumina) and sequenced for 45 cycles  
398 on Illumina HiSeq 2000 platform (paired end, 150bp read length).

### 399 RNA-seq Analysis

400 Normalized counts and gene set enrichment analysis statistics were generated with Partek  
401 Flow. Reads were aligned to the hg19 build of the human genome with STAR and quantified to  
402 an hg19 RefSeq annotation model through Partek E/M. Gene counts were normalized as counts  
403 per million (CPM) and differential analysis was performed with GSA. Ingenuity Pathway Analysis  
404 (Ingenuity Systems QIAGEN) software was used to perform Canonical Pathway and Upstream  
405 Regulator analyses (Cutoff:  $p < 0.05$ ;  $-1.5 > \text{Fold Change} > 1.5$ ). Metabolic network analysis was  
406 done using MetaCore (Clarivate) (Cutoff:  $p < 0.005$ ). GSEA analysis was used to produce  
407 Hallmark gene sets (1000 permutations, collapse to gene symbols, permutate to phenotype).  
408 Data are deposited in NCBI Gene Expression Omnibus and are available under GEO accession  
409 GSE201466.

### 410 Western Blotting Analysis

411 Cells or tissues were lysed on ice with ice-cold lysis buffer containing 50 mM Tris-HCl, pH 7.4,  
412 0.1 mM EDTA, 0.1 mM EGTA, 1% Nonidet P-40, 0.1% sodium deoxycholate, 0.1% SDS, 100  
413 mM NaCl, 10 mM NaF, 1 mM sodium pyrophosphate, 1 mM sodium orthovanadate, 1 mM  
414 Pefabloc SC, and 2 mg/ml protease inhibitor mixture (Roche Diagnostics) and samples  
415 prepared. Total protein (25µg) was loaded into SDS-PAGE followed by transfer to nitrocellulose  
416 membranes. Immunoblotting was performed at 4°C overnight followed by 1hr incubation with LI-  
417 COR compatible fluorescent-labeled secondary antibodies (LI-COR Biosciences). Bands were  
418 visualized on the Odyssey CLx platform (LICOR Biosciences). Quantifications were based on  
419 densitometry using ImageJ.

#### 420 Quantitative RT-qPCR

421 RNA from cells or tissues were isolated using the RNeasy Plus Kit (Qiagen). 0.5 mg  
422 RNA/sample was retrotranscribed with the iScript cDNA Synthesis Kit (BioRad). Real-time  
423 quantitative PCR (qPCR) reactions were performed in duplicate using the CFX-96 Real Time  
424 PCR system (Bio-Rad). Quantitative PCR primers were designed using Primer3 software and  
425 synthesized by Yale School of Medicine Oligo Synthesis facility. Fold changes were calculated  
426 using the comparative Ct method.

#### 427 Dil-LDL Uptake

428 Cells were washed in PBS and treated for 1hr with plain EBM-2 containing 2.5µg/mL Dil-LDL  
429 (Kalen Biomedical). Cells were washed for 5min with acid wash (25mM Glycine, 3% (m/V) BSA  
430 in PBS at pH 4.0), before suspended in PBS, washed, and fixed. PE mean fluorescence  
431 intensity per cell was measured by LSRII (BD Biosciences) flow cytometer the same day of the  
432 assay and analyzed using FlowJo.

#### 433 Thin Layer Chromatography (TLC)

434 Dried lipids were resuspended in hexane and loaded onto a silica gel TLC 60 plate (Millipore  
435 Sigma) and run in hexane:diethyl ether:acetic acid (70:30:1) until the solvent line reached

436 approximately 1 inch from the top. Standards of pure triglycerides, diacylglycerides, cholesterol,  
437 and cholesterol ester were loaded for reference. After drying, the plate was exposed to a  
438 phosphor screen for 1 week and imaged using a Typhoon phosphorimager.

#### 439 Cholesterol Efflux Assay

440 Cells were equilibrated with 1 $\mu$ Ci/mL 3H-cholesterol (PerkinElmer) for 16hrs in full media  
441 containing FBS and ACAT inhibitor 58035 (Sigma). Next, cells were washed twice with PBS and  
442 incubated for 6hrs in serum-free media containing 58035 and indicated cholesterol acceptor.  
443 Media and cell lysis were harvested at the end of 6 hr. Ultima Gold scintillation liquid  
444 (PerkinElmer) were added to the media and cell lysis, respectively, and radioactivity was  
445 quantified using a Tri-Carb 2100 liquid scintillation counter (PerkinElmer). Efflux was measured  
446 as percent counts in media divided by counts in the cell lysis.

#### 447 Filipin Staining

448 Confluent HUVEC cells were fixed and stained with 50 $\mu$ g/mL Filipin and FITC-conjugated lectin  
449 from Ulex Europaeus Agglutinin I (FITC-UEAI). Images were taken on a confocal microscope  
450 (SP5, Leica). UV signal (Filipin) was immediately recorded after FITC-UEAI was used to find  
451 appropriate z-stack/cellular context.

#### 452 Total Cholesterol Extraction and Quantification

453 Total lipids extracted in 2:1 chloroform methanol. The solution was dried under nitrogen gas.  
454 Cholesterol was quantified according to the kit protocol (abcam).

#### 455 Lipidomics

456 Mass spectrometry-based lipid analysis was performed by Lipotype GmbH (Dresden, Germany)  
457 as described (Sampaio et al. 2011). Lipids were extracted using a two-step chloroform/methanol  
458 procedure (Ejsing et al. 2009). Samples were spiked with internal lipid standard mixture  
459 containing: cardiolipin 14:0/14:0/14:0/14:0 (CL), ceramide 18:1;2/17:0 (Cer), diacylglycerol  
460 17:0/17:0 (DAG), hexosylceramide 18:1;2/12:0 (HexCer), lyso-phosphatidate 17:0 (LPA), lyso-

461 phosphatidylcholine 12:0 (LPC), lyso-phosphatidylethanolamine 17:1 (LPE), lyso-  
462 phosphatidylglycerol 17:1 (LPG), lyso-phosphatidylinositol 17:1 (LPI), lyso-phosphatidylserine  
463 17:1 (LPS), phosphatidate 17:0/17:0 (PA), phosphatidylcholine 17:0/17:0 (PC),  
464 phosphatidylethanolamine 17:0/17:0 (PE), phosphatidylglycerol 17:0/17:0 (PG),  
465 phosphatidylinositol 16:0/16:0 (PI), phosphatidylserine 17:0/17:0 (PS), cholesterol ester 20:0  
466 (CE), sphingomyelin 18:1;2/12:0;0 (SM), sulfatide d18:1;2/12:0;0 (Sulf), triacylglycerol  
467 17:0/17:0/17:0 (TAG) and cholesterol D6 (Chol). After extraction, the organic phase was  
468 transferred to an infusion plate and dried in a speed vacuum concentrator. 1st step dry extract  
469 was re-suspended in 7.5 mM ammonium acetate in chloroform/methanol/propanol (1:2:4, V:V:V)  
470 and 2nd step dry extract in 33% ethanol solution of methylamine in chloroform/methanol  
471 (0.003:5:1; V:V:V). All liquid handling steps were performed using Hamilton Robotics STARlet  
472 robotic platform with the Anti Droplet Control feature for organic solvents pipetting. Samples  
473 were analyzed by direct infusion on a QExactive mass spectrometer (Thermo Scientific)  
474 equipped with a TriVersa NanoMate ion source (Advion Biosciences). Samples were analyzed  
475 in both positive and negative ion modes with a resolution of  $R_{m/z=200}=280000$  for MS and  
476  $R_{m/z=200}=17500$  for MSMS experiments, in a single acquisition. MSMS was triggered by an  
477 inclusion list encompassing corresponding MS mass ranges scanned in 1 Da increments  
478 (Surma et al. 2015). Both MS and MSMS data were combined to monitor CE, DAG and TAG  
479 ions as ammonium adducts; PC, PC O<sup>-</sup>, as acetate adducts; and CL, PA, PE, PE O<sup>-</sup>, PG, PI  
480 and PS as deprotonated anions. MS only was used to monitor LPA, LPE, LPE O<sup>-</sup>, LPI and LPS  
481 as deprotonated anions; Cer, HexCer, SM, LPC and LPC O<sup>-</sup> as acetate adducts and cholesterol  
482 as ammonium adduct of an acetylated derivative (Liebisch et al. 2006). Data were analyzed with  
483 in-house developed lipid identification software based on LipidXplorer (Herzog et al. 2011;  
484 Herzog et al. 2012). Data post-processing and normalization were performed using an in-house  
485 developed data management system. Only lipid identifications with a signal-to-noise ratio >5,

486 and a signal intensity 5-fold higher than in corresponding blank samples were considered for  
487 further data analysis.

#### 488 ALOD4 and OlyA Purification

489 ALOD4 and OlyA expression constructs were generously provided by the lab of Dr. Arun  
490 Radhakrishnan. Recombinant His-tagged ALOD4 and OlyA were purified as previously  
491 described (Endapally *et al.*, 2019). Briefly, ALOD4 expression was induced with 1mM IPTG in  
492 OD<sub>0.5</sub> BL21 (DE3) pLysS *E. coli* for 16hr at 18°C. Cells were lysed and His-ALOD4 and His-  
493 OlyA were isolated by nickel purification followed by size exclusion chromatography (HisTrap-  
494 HP Ni column, Tricorn 10/300 Superdex 200 gel filtration column; FPLC AKTA, GE Healthcare).  
495 Protein-rich fractions were pooled and concentration was measured using a NanoDrop  
496 instrument.

#### 497 ALOD4 Fluorescent Labeling

498 20nmol ALOD4 was combined with 200nm AlexaFluor maleimide (ThermoFisher) in 50mM Tris-  
499 HCl, 1mM TCEP, 150mM NaCl pH 7.5 and incubated at 4°C for 16hr. The reaction was  
500 quenched using 10mM DTT. Unbound fluorescent label and DTT were removed by dialysis  
501 (EMD Millipore).

#### 502 ALOD4 Binding and Western Blot Analysis

503 At time of collection, HUVEC were washed 3 times for 5min in PBS with Ca<sup>2+</sup> and Mg<sup>2+</sup>  
504 containing 0.2% (wt/vol) BSA. Cells were then incubated with 3μM ALOD4 in basal EBM2 media  
505 containing 0.2% (wt/vol) BSA for 1hr at 4°C. The unbound proteins were removed by washing  
506 three times with PBS with Ca<sup>2+</sup> and Mg<sup>2+</sup> for 5min each. Cells were then lysed and prepared for  
507 SDS-PAGE and immunoblotting. ALOD4 was probed on nitrocellulose gels using anti-6X His  
508 (abcam) antibody at 15kDa. A similar method was used for OlyA binding.

#### 509 ALOD4 In-Cell Western Blot Analysis

510 Cells were cultured onto 96 wells and ALOD4 binding was performed as mentioned above up  
511 until lysis. Cells were directly incubated with DyLight680-conjugated anti-His antibody  
512 (Thermofisher), washed, and 700nm fluorescence was recorded directly on Odyssey CLx  
513 platform (LICOR Biosciences).

#### 514 ALOD4 Flow Cytometry Analysis

515 Cells were suspended in PBS with Ca<sup>2+</sup> and Mg<sup>2+</sup> containing 2% FBS and washed 3 times.  
516 Binding was with 3 $\mu$ M ALOD4-647 for 1hr at 4°C. Cells were then washed 3 times with PBS  
517 with Ca<sup>2+</sup> and Mg<sup>2+</sup> containing 2% FBS and mean fluorescence intensity per cell was measured  
518 by LSRII (BD Biosciences) flow cytometer the same day of the assay.

#### 519 Animal Studies

520 All animals were handled according to approved institutional animal care and use committee  
521 (IACUC) protocols (#07919-2020) of Yale University. At 10 weeks of age, male C57BL/6J mice  
522 (JAX, #000664) were injected with 15mg/kg lipopolysaccharide (LPS) from E. Coli O111:B4  
523 intraperitoneally (Sigma). 6 hours later, blood was collected for lipid and cytokine analysis. Mice  
524 were perfused with PBS and lungs were processed for flow cytometry analysis. Briefly, lung  
525 cells were brought to a single-cell suspension via collagenase incubation and then stained for  
526 flow cytometry at a concentration of 5x10<sup>6</sup> cells/mL with Cd31 (Biolegend) and 3 $\mu$ M ALOD4-47.

#### 527 Statistics

528 Statistical differences were measured with an unpaired 2- sided Student's t-test or ANOVA with  
529 listed correction for multiple corrections. A value of p<0.05 was considered statistically  
530 significant. "n" within figure legends involving HUVEC denotes number of donors used for the  
531 respective experiment. Data analysis was performed with GraphPad Prism software (GraphPad,  
532 San Diego, CA).

#### 533 Oligonucleotides

534

| <u>Reagent/Resource</u> | <u>Source</u> | <u>Identifier</u> |
|-------------------------|---------------|-------------------|
|-------------------------|---------------|-------------------|

|                                     |                         |                        |
|-------------------------------------|-------------------------|------------------------|
| RELA Silencer<br>Select siRNA       | ThermoFisher Scientific | S11914                 |
| SREBF2 Silencer<br>Select siRNA     | ThermoFisher Scientific | s27                    |
| HMGCR Silencer<br>siRNA             | ThermoFisher Scientific | 110740                 |
| SCAP Silencer<br>Select siRNA       | ThermoFisher Scientific | s695                   |
| STARD10 Silencer<br>Select siRNA #1 | ThermoFisher Scientific | s21244                 |
| STARD10 Silencer<br>Select siRNA #2 | ThermoFisher Scientific | s21243                 |
| Bactin_F                            | This Paper              | AGCACTGTGTTGGCGTACAG   |
| Bactin_R                            | This Paper              | GGACTTCGAGCAAGAGATGG   |
| hsLDLR_F                            | This Paper              | TCTGCAACATGGCTAGAGACT  |
| hsLDLR_R                            | This Paper              | TCCAAGCATTTCGTTGGTCCC  |
| hsHMGCS1_F                          | This Paper              | CAAAAAGATCCATGCCCAGT   |
| hsHMGCS1_R                          | This Paper              | AAAGGCTTCCAGGCCACTAT   |
| hsHMGCR_F                           | This Paper              | TGATTGACCTTTCCAGAGCAAG |
| hsHMGCR_R                           | This Paper              | CTAAAATTGCCATTCCACGAGC |
| hsINSIG1_F                          | This Paper              | GCACTGCATTAAACGTGTGG   |
| hsINSIG1_R                          | This Paper              | GCAGCACTGAAATGAATGGA   |
| hsSREBF2_F                          | This Paper              | TAAAGGAGAGGCACAGGA     |
| hsSREBF2_R                          | This Paper              | AGGAGAACATGGTGCTGA     |
| hsICAM1_F                           | This Paper              | GTGGTAGCAGCCGCAGTC     |
| hsICAM1_R                           | This Paper              | GGCTTGTGTGTTTCGGTTTCA  |
| hsCXCL1_F                           | This Paper              | AGGGAATTCACCCCAAGAAC   |
| hsCXCL1_R                           | This Paper              | TGGATTTGTCAGTTCAGCA    |
| hsSELE_F                            | This Paper              | ACCTCCACGGAAGCTATGACT  |
| hsSELE_R                            | This Paper              | CAGACCCACACATTGTTGACTT |
| hsSCAP_F                            | This Paper              | CGCAAACAAGGAGAGCCTAC   |
| hsSCAP_R                            | This Paper              | TGTCTCTCAGCACGTGGTTC   |

535

536 *Antibodies*

537

| <b>Reagent/Resource</b>   | <b>Source</b>              | <b>Identifier</b> |
|---------------------------|----------------------------|-------------------|
| 6x His Tag DyLight<br>680 | ThermoFisher<br>Scientific | MA1-21315-D680    |
| Anti-6X His               | Abcam                      | ab18184           |
| BV605-mCD31               | BioLegend                  | 102427            |
| GAPDH                     | Cell Signaling             | 2118S             |



|            |                |          |
|------------|----------------|----------|
| HSP90      | Santa Cruz     | sc-13119 |
| ICAM1      | Cell Signaling | 4915S    |
| JNK1       | Cell Signaling | 3708S    |
| LC3b       | Cell Signaling | 2775S    |
| LDLR       | Abcam          | ab52818  |
| p-JNK1     | Cell Signaling | 9261S    |
| p-p38      | Cell Signaling | 9211S    |
| p38        | Cell Signaling | 9212S    |
| P65 (RELA) | Cell Signaling | 8242S    |
| SREBP1a    | Santa Cruz     | sc-13551 |
| SREBP2     | BD Biosciences | 557037   |
| VCAM1      | Santa Cruz     | sc-13160 |

538  
539  
540

Chemicals

| <b>Reagent/Resource</b>                 | <b>Source</b>    | <b>Identifier</b> |
|-----------------------------------------|------------------|-------------------|
| 25-Hydroxycholesterol                   | Sigma Aldrich    | H1015             |
| Actinomycin D                           | ThermoFisher     | 11805017          |
| BAY 117082                              | Sigma Aldrich    | B556-10MG         |
| Cholesterol, 1,2-3H(N)                  | Perkin Elmer     | NET139250UC       |
| Choroquine (CQ)                         | Sigma Aldrich    | C6628             |
| Dil LDL                                 | Kalen Biomedical | 770230            |
| EGM2                                    | Lonza            | CC-3162           |
| Fatostatin                              | Cayman           | 13562             |
| Filipin                                 | Cayman           | 70440             |
| FITC-UEAI                               | ThermoFisher     | L32476            |
| Lipopolysaccharide from E. coli O111:B4 | Sigma Aldrich    | L2630             |
| Lipoprotein Depleted Serum (LPDS)       | Kalen Biomedical | 880100            |
| M $\beta$ CD                            | Sigma Aldrich    | C4555             |
| M $\beta$ CD-Cholesterol                | Sigma Aldrich    | C4951             |
| Native LDL                              | Kalen Biomedical | 770200            |
| Pefabloc                                | Sigma Aldrich    | 11873601001       |
| PF-429242                               | Sigma Aldrich    | SML0667           |
| Protease Inhibitor Mixture              | Roche            | 11697498001       |
| rhIL1 $\beta$                           | RD Systems       | 201-LB-010/CF     |
| rhTNF $\alpha$                          | RD Systems       | 210-TA-020/CF     |
| Sandoz 58-035                           | Sigma Aldrich    | S9318-25mg        |
| TLC Silica Gel 60                       | Millipore Sigma  | 105553            |

|                  |               |       |
|------------------|---------------|-------|
| Sphingomyelinase | Sigma Aldrich | S8633 |
| T0901317         | Sigma Aldrich | T2320 |
| Triacin C        | RD Systems    | 2472  |
| U18666A          | Sigma Aldrich | U3633 |

541

542

543 **Acknowledgements.** This work was supported by NIH grant R35HL139945, RO1DK125492,  
544 PO1 HL1070205 to WCS and a Supplement to R35HL139945 to JWF and K01DK124441 to  
545 NEB.

546

547 **Author Contributions** JWF and WCS conceived the project, designed experiments, and wrote  
548 the manuscript. RZ produced and purified ALOD4 and OlyA Probes. NEB and BT contributed  
549 intellectually and experimentally to the MS. WCS supervised the project.

550

551 **Competing interests:** The authors declare no competing interests.

552

553

554

555

556

557

558

559

560

561

562

563

564

565

566

567

568

569

570

571

572

573

574

575

576

577

578

579

580

581

582

583

584 **References**

- 585 Aggarwal, B. B. (2003). "Signalling pathways of the TNF superfamily: a double-edged sword."  
586 Nat Rev Immunol **3**(9): 745-756.
- 587
- 588 Araldi, E., M. Fernandez-Fuertes, A. Canfran-Duque, W. Tang, G. W. Cline, J. Madrigal-Matute,  
589 J. S. Pober, M. A. Lasuncion, D. Wu, C. Fernandez-Hernando and Y. Suarez (2017).  
590 "Lanosterol Modulates TLR4-Mediated Innate Immune Responses in Macrophages." Cell Rep  
591 **19**(13): 2743-2755.
- 592
- 593 Brown, M. S. and J. L. Goldstein (1997). "The SREBP pathway: regulation of cholesterol  
594 metabolism by proteolysis of a membrane-bound transcription factor." Cell **89**(3): 331-340  
595
- 596 Bekkering, S., R. J. W. Arts, B. Novakovic, I. Kourtzelis, C. van der Heijden, Y. Li, C. D. Popa,  
597 R. Ter Horst, J. van Tuijl, R. T. Netea-Maier, F. L. van de Veerdonk, T. Chavakis, L. A. B.  
598 Joosten, J. W. M. van der Meer, H. Stunnenberg, N. P. Riksen and M. G. Netea (2018).  
599 "Metabolic Induction of Trained Immunity through the Mevalonate Pathway." Cell **172**(1-2): 135-  
600 146 e139.
- 601
- 602 Briggs, M. R., C. Yokoyama, X. Wang, M. S. Brown and J. L. Goldstein (1993). "Nuclear protein  
603 that binds sterol regulatory element of low density lipoprotein receptor promoter. I. Identification  
604 of the protein and delineation of its target nucleotide sequence." J Biol Chem **268**(19): 14490-  
605 14496
- 606
- 607 Dang, E. V., J. G. McDonald, D. W. Russell and J. G. Cyster (2017). "Oxysterol Restraint of  
608 Cholesterol Synthesis Prevents AIM2 Inflammasome Activation." Cell **171**(5): 1057-1071 e1011.  
609
- 610 DiDonato, J. A., M. Hayakawa, D. M. Rothwarf, E. Zandi and M. Karin (1997). "A cytokine-  
611 responsive I $\kappa$ B kinase that activates the transcription factor NF- $\kappa$ B." Nature  
612 **388**(6642): 548-554.
- 613
- 614 Endapally, S., R. E. Infante and A. Radhakrishnan (2019). "Monitoring and Modulating  
615 Intracellular Cholesterol Trafficking Using ALOD4, a Cholesterol-Binding Protein." Methods Mol  
616 Biol **1949**: 153-163.
- 617
- 618 Endapally, S., D. Frias, M. Grzemska, A. Gay, D. R. Tomchick and A. Radhakrishnan (2019).  
619 "Molecular Discrimination between Two Conformations of Sphingomyelin in Plasma  
620 Membranes." Cell **176**(5): 1040-1053 e1017.
- 621
- 622 Ejsing, C. S., J. L. Sampaio, V. Surendranath, E. Duchoslav, K. Ekroos, R. W. Klemm, K.  
623 Simons and A. Shevchenko (2009). "Global analysis of the yeast lipidome by quantitative  
624 shotgun mass spectrometry." Proc Natl Acad Sci U S A **106**(7): 2136-2141.
- 625
- 626 Gay, A., D. Rye and A. Radhakrishnan (2015). "Switch-like responses of two cholesterol  
627 sensors do not require protein oligomerization in membranes." Biophys J **108**(6): 1459-1469  
628
- 629 Guo, C., Z. Chi, D. Jiang, T. Xu, W. Yu, Z. Wang, S. Chen, L. Zhang, Q. Liu, X. Guo, X. Zhang,  
630 W. Li, L. Lu, Y. Wu, B. L. Song and D. Wang (2018). "Cholesterol Homeostatic Regulator  
631 SCAP-SREBP2 Integrates NLRP3 Inflammasome Activation and Cholesterol Biosynthetic  
632 Signaling in Macrophages." Immunity **49**(5): 842-856 e847.
- 633

- 634 Herzog, R., D. Schwudke, K. Schuhmann, J. L. Sampaio, S. R. Bornstein, M. Schroeder and A.  
635 Shevchenko (2011). "A novel informatics concept for high-throughput shotgun lipidomics based  
636 on the molecular fragmentation query language." Genome Biol **12**(1): R8.  
637
- 638 Herzog, R., K. Schuhmann, D. Schwudke, J. L. Sampaio, S. R. Bornstein, M. Schroeder and A.  
639 Shevchenko (2012). "LipidXplorer: a software for consensual cross-platform lipidomics." PLoS  
640 One **7**(1): e29851.  
641
- 642 Hogan, N. T., M. B. Whalen, L. K. Stolze, N. K. Hadeli, M. T. Lam, J. R. Springstead, C. K.  
643 Glass and C. E. Romanoski (2017). "Transcriptional networks specifying homeostatic and  
644 inflammatory programs of gene expression in human aortic endothelial cells." Elife **6**.  
645
- 646 Horton, J. D., J. L. Goldstein and M. S. Brown (2002). "SREBPs: activators of the complete  
647 program of cholesterol and fatty acid synthesis in the liver." J Clin Invest **109**(9): 1125-1131.  
648
- 649 Hua, X., J. Sakai, Y. K. Ho, J. L. Goldstein and M. S. Brown (1995). "Hairpin orientation of sterol  
650 regulatory element-binding protein-2 in cell membranes as determined by protease protection."  
651 J Biol Chem **270**(49): 29422-29427.  
652
- 653 Im, S. S., L. Yousef, C. Blaschitz, J. Z. Liu, R. A. Edwards, S. G. Young, M. Raffatellu and T. F.  
654 Osborne (2011). "Linking lipid metabolism to the innate immune response in macrophages  
655 through sterol regulatory element binding protein-1a." Cell Metab **13**(5): 540-549.  
656
- 657 Infante, R. E. and A. Radhakrishnan (2017). "Continuous transport of a small fraction of plasma  
658 membrane cholesterol to endoplasmic reticulum regulates total cellular cholesterol." Elife **6**.  
659
- 660 Keller, S. A., E. J. Schattner and E. Cesarman (2000). "Inhibition of NF-kappaB induces  
661 apoptosis of KSHV-infected primary effusion lymphoma cells." Blood **96**(7): 2537-2542.  
662
- 663 Kim, J. Y., R. Garcia-Carbonell, S. Yamachika, P. Zhao, D. Dhar, R. Loomba, R. J. Kaufman, A.  
664 R. Saltiel and M. Karin (2018). "ER Stress Drives Lipogenesis and Steatohepatitis via Caspase-  
665 2 Activation of S1P." Cell **175**(1): 133-145 e115.  
666
- 667 Kusnadi, A., S. H. Park, R. Yuan, T. Pannellini, E. Giannopoulou, D. Oliver, T. Lu, K. H. Park-  
668 Min and L. B. Ivashkiv (2019). "The Cytokine TNF Promotes Transcription Factor SREBP  
669 Activity and Binding to Inflammatory Genes to Activate Macrophages and Limit Tissue Repair."  
670 Immunity **51**(2): 241-257 e249  
671
- 672 Lagace, T. A. (2015). "Phosphatidylcholine: Greasing the Cholesterol Transport Machinery."  
673 Lipid Insights **8**(Suppl 1): 65-73.  
674
- 675 Libby, P., J. E. Buring, L. Badimon, G. K. Hansson, J. Deanfield, M. S. Bittencourt, L.  
676 Tokgözoğlu and E. F. Lewis (2019). "Atherosclerosis." Nature Reviews Disease Primers **5**(1):  
677 56.  
678
- 679 Liebisch, G., M. Binder, R. Schifferer, T. Langmann, B. Schulz and G. Schmitz (2006). "High  
680 throughput quantification of cholesterol and cholesteryl ester by electrospray ionization tandem  
681 mass spectrometry (ESI-MS/MS)." Biochim Biophys Acta **1761**(1): 121-128.  
682
- 683 Mesmin, B. and F. R. Maxfield (2009). "Intracellular sterol dynamics." Biochim Biophys Acta  
684 **1791**(7): 636-645.

685  
686 Pober, J. S. and W. C. Sessa (2007). "Evolving functions of endothelial cells in inflammation."  
687 Nat Rev Immunol **7**(10): 803-815.  
688  
689 Radhakrishnan, A., Y. Ikeda, H. J. Kwon, M. S. Brown and J. L. Goldstein (2007). "Sterol-  
690 regulated transport of SREBPs from endoplasmic reticulum to Golgi: oxysterols block transport  
691 by binding to Insig." Proc Natl Acad Sci U S A **104**(16): 6511-6518.  
692  
693 Sakai, J., E. A. Duncan, R. B. Rawson, X. Hua, M. S. Brown and J. L. Goldstein (1996). "Sterol-  
694 regulated release of SREBP-2 from cell membranes requires two sequential cleavages, one  
695 within a transmembrane segment." Cell **85**(7): 1037-1046.  
696  
697 Sampaio, J. L., M. J. Gerl, C. Klose, C. S. Ejsing, H. Beug, K. Simons and A. Shevchenko  
698 (2011). "Membrane lipidome of an epithelial cell line." Proc Natl Acad Sci U S A **108**(5): 1903-  
699 1907.  
700  
701 Shimano, H. and R. Sato (2017). "SREBP-regulated lipid metabolism: convergent physiology -  
702 divergent pathophysiology." Nat Rev Endocrinol **13**(12): 710-730.  
703  
704 Surma, M. A., R. Herzog, A. Vasilij, C. Klose, N. Christinat, D. Morin-Rivron, K. Simons, M.  
705 Masoodi and J. L. Sampaio (2015). "An automated shotgun lipidomics platform for high  
706 throughput, comprehensive, and quantitative analysis of blood plasma intact lipids." Eur J Lipid  
707 Sci Technol **117**(10): 1540-1549.  
708  
709 Tabas, I. (2002). "Consequences of cellular cholesterol accumulation: basic concepts and  
710 physiological implications." J Clin Invest **110**(7): 905-911.  
711  
712 Westerterp, M., K. Tsuchiya, I. W. Tattersall, P. Fotakis, A. E. Bochem, M. M. Molusky, V.  
713 Ntonga, S. Abramowicz, J. S. Parks, C. L. Welch, J. Kitajewski, D. Accili and A. R. Tall (2016).  
714 "Deficiency of ATP-Binding Cassette Transporters A1 and G1 in Endothelial Cells Accelerates  
715 Atherosclerosis in Mice." Arterioscler Thromb Vasc Biol **36**(7): 1328-1337.  
716  
717 Xiao, H., M. Lu, T. Y. Lin, Z. Chen, G. Chen, W. C. Wang, T. Marin, T. P. Shentu, L. Wen, B.  
718 Gongol, W. Sun, X. Liang, J. Chen, H. D. Huang, J. H. Pedra, D. A. Johnson and J. Y. Shyy  
719 (2013). "Sterol regulatory element binding protein 2 activation of NLRP3 inflammasome in  
720 endothelium mediates hemodynamic-induced atherosclerosis susceptibility." Circulation **128**(6):  
721 632-642.  
722  
723 Yeh, M., A. L. Cole, J. Choi, Y. Liu, D. Tulchinsky, J. H. Qiao, M. C. Fishbein, A. N. Dooley, T.  
724 Hovnanian, K. Mouilleseaux, D. K. Vora, W. P. Yang, P. Gargalovic, T. Kirchgessner, J. Y. Shyy  
725 and J. A. Berliner (2004). "Role for sterol regulatory element-binding protein in activation of  
726 endothelial cells by phospholipid oxidation products." Circ Res **95**(8): 780-788.  
727  
728 York, A. G., K. J. Williams, J. P. Argus, Q. D. Zhou, G. Brar, L. Vergnes, E. E. Gray, A. Zhen, N.  
729 C. Wu, D. H. Yamada, C. R. Cunningham, E. J. Tarling, M. Q. Wilks, D. Casero, D. H. Gray, A.  
730 K. Yu, E. S. Wang, D. G. Brooks, R. Sun, S. G. Kitchen, T. T. Wu, K. Reue, D. B. Stetson and  
731 S. J. Bensinger (2015). "Limiting Cholesterol Biosynthetic Flux Spontaneously Engages Type I  
732 IFN Signaling." Cell **163**(7): 1716-1729.  
733  
734  
735

736 **Figure Legends**

737 **Figure 1. TNF $\alpha$  and NF- $\kappa$ B control SREBP2-dependent gene expression in human**  
738 **endothelial cells.**

739 Primary HUVEC were treated siRNA against non-targeting sequence (siCTRL) or RELA for 48hr  
740 and then incubated with or without 10ng/mL TNF $\alpha$  for 10hr.

741 (a) Volcano plot for RNA-seq analysis of differentially expressed genes. Dotted red lines  
742 indicate cutoff used for IPA analysis ( $p < 0.05$ ,  $1.5 < \text{Fold Change (F.C)} < -1.5$ ).

743 (b) IPA analysis of most significant canonical pathways and predicted upstream transcriptional  
744 regulators for genes that increase at 10hr TNF $\alpha$ .

745 (c) IPA analysis of most significant canonical pathways and predicted upstream transcriptional  
746 regulators for genes that decrease in cells knocked down with RELA siRNA and treated  
747 10hr TNF $\alpha$  compared to control cells treated with 10hr TNF $\alpha$ .

748 (d) Representative heatmap of NF- $\kappa$ B and SREBP2 transcriptionally controlled genes from (b)  
749 and (c) showing 3 independent donors.

750 **Figure 2. TNF $\alpha$  increases SREBP2 cleavage and transcription of canonical sterol-**  
751 **responsive genes**

752 (a) SREBP2 immunoblot from whole-cell lysates from HUVEC treated with TNF $\alpha$  (10ng/mL) for  
753 indicated time. Data are normalized to respective GAPDH and then to untreated cells (n=3).

754 (b) qRT-PCR analysis of RNA from HUVEC treated with TNF $\alpha$  (10ng/mL) for indicated time.  
755 Data are normalized to respective *GAPDH* and then to untreated cells (n=8).

756 (c) LDLR protein levels of TNF $\alpha$ -treated HUVEC treated with or without native LDL (25 $\mu$ g/mL).  
757 Data are normalized to respective HSP90 levels and then to untreated cells (n=4).

758 (d) Flow cytometry analysis of exogenous Dil-LDL uptake in HUVEC treated with TNF $\alpha$  and  
759 with indicated media. 2.5 $\mu$ g/mL Dil-LDL was incubated for 1hr at 37°C before processing for  
760 flow cytometry. Uptake was quantified by PE mean fluorescence intensity per cell and  
761 normalized to untreated cells in LPDS across two experiments (10,000 events/replicate,  
762 n=4).

763 \* $p < 0.05$ ; \*\* $p < 0.01$ ; \*\*\* $p < 0.001$ ; \*\*\*\* $p < 0.0001$  by one-way ANOVA with Dunnett's multiple  
764 comparisons test (a and b) or two-way ANOVA with Sidak's multiple comparisons test (c and d).

765 **Figure 3. RELA DNA-binding is necessary for activation of SREBP2 by inflammatory**  
766 **stress.**

767 (a) Representative immunoblot of SREBP2 and LDLR protein levels in HUVEC treated with  
768 TNF $\alpha$  (10ng/mL), IL1 $\beta$  (10ng/mL), or LPS (100ng/mL).

- 769 (b) Representative immunoblot of SREBP2 and LDLR protein levels in HUVEC treated with  
770 actinomycin D (ActD, 10ng/mL ) and with or without TNF $\alpha$  (10ng/mL).
- 771 (c) SREBP2 and LDLR protein levels in HUVEC treated with IL1 $\beta$  (10ng/mL) or TNF $\alpha$   
772 (10ng/mL) and with or without NF- $\kappa$ B inhibitor, BAY11-7082 (5 $\mu$ M). Data are normalized to  
773 respective HSP90 and then to untreated cells (n=3).
- 774 (d) qRT-PCR analysis of SREBP2-dependent genes, *SREBF2*, *LDLR*, *HMGCS1*, *HMGCR*, and  
775 *INSIG1*, expression in HUVEC treated with or without TNF $\alpha$  (10ng/mL) and BAY11-7082  
776 (5 $\mu$ M). Data are normalized to respective *GAPDH* and then to untreated cells (n=6).
- 777 (e) SREBP2 and RELA levels in TNF $\alpha$  (10ng/mL)-treated HUVEC treated with or without siRNA  
778 targeting RELA. Data are normalized to respective HSP90 and then to untreated cells (n=4).
- 779 \*p<0.05; \*\*p<0.01; \*\*\*p<0.001; \*\*\*\*p<0.0001 by one-way ANOVA (c and e) or two-way ANOVA  
780 (d) with Tukey's multiple comparison's test.

781 **Figure 4. Cytokine-mediated upregulation of SREBP2 cleavage requires proper SCAP**  
782 **shuttling and proteolytic processing in the Golgi**

- 783 (a) Schematic of where 25-hydroxycholesterol (25HC), cholesterol, siSCAP, and PF-429242  
784 inhibit SREBP processing throughout the pathway.
- 785 (b) Representative immunoblot of SREBP2 and LDLR protein levels in HUVEC treated with  
786 TNF $\alpha$  (10ng/mL) and cholesterol (Chol) (25 $\mu$ g/mL). Data are normalized to respective  
787 HSP90 and then to untreated cells.
- 788 (c) Representative immunoblot of SREBP2 and LDLR protein levels in HUVEC treated with  
789 TNF $\alpha$  (10ng/mL) and increasing concentrations of LDL. Data are normalized to respective  
790 HSP90 and then to untreated cells.
- 791 (d) Representative immunoblot SREBP2 cleavage in HUVEC treated with IL1 $\beta$  (10ng/mL) or  
792 TNF $\alpha$  (10ng/mL) and SCAP siRNA. Data are normalized to respective HSP90 and then to  
793 untreated cells.
- 794 (e) Representative immunoblot of SREBP2 and LDLR protein levels in HUVEC treated with  
795 TNF $\alpha$  (10ng/mL) and increasing concentrations of 25-hydroxycholesterol (25HC). Data are  
796 normalized to respective HSP90 and then to untreated cells.
- 797 (f) Representative immunoblot of SREBP2 and LDLR protein levels in HUVEC treated with  
798 TNF $\alpha$  (10ng/mL) and PF-429242 (10 $\mu$ M) for indicated time. Data are normalized to  
799 respective HSP90 and then to untreated cells.



800 (g) qRT-PCR analysis of *SREBF2*, *HMGCS1*, and *SCAP* from RNA of HUVECs treated with  
801  $\text{TNF}\alpha$  (10ng/mL) and indicated SREBP2 inhibitor. Data are normalized to respective  
802 *GAPDH* and then to untreated cells (n=6).

803 \*p<0.05; \*\*p<0.01; \*\*\*p<0.001; \*\*\*\*p<0.0001 by two-way ANOVA with Sidak's multiple  
804 comparisons test.

805 **Figure 5.  $\text{TNF}\alpha$  decreases accessible cholesterol in cultured HUVEC and mouse lung ECs**  
806 ***in vivo***

807 (a) Quantification of total cholesterol extracted from HUVEC treated with or without  $\text{TNF}\alpha$   
808 (10ng/mL) and indicated positive controls, lipoprotein deficient serum (LPDS), fetal bovine  
809 serum (FBS), or M $\beta$ CD-cholesterol. Data were normalized to respective total protein (n=3).

810 (b) Total cholesterol in HUVEC after 4 or 10 hr of  $\text{TNF}\alpha$  (10ng/mL) quantified by mass  
811 spectrometry (n=3).

812 (c) ALOD4 protein levels in HUVEC treated with  $\text{TNF}\alpha$  (10ng/mL). Data are normalized to  
813 respective HSP90 and then to untreated cells (n=7).

814 (d) In-cell Western blot of ALOD4 protein levels in HUVEC treated with  $\text{TNF}\alpha$  (10ng/mL) and  
815 PF-429242 (10 $\mu$ M). Data are normalized to respective total protein and then to untreated  
816 cells (n=6).

817 (e) In-cell Western blot of ALOD4 protein levels in HUVEC treated with  $\text{TNF}\alpha$  (10ng/mL) and  
818 PF-429242 (10 $\mu$ M) for indicated time. Data are normalized to respective total protein and  
819 then to untreated cells (n=6).

820 (f) ALOD4 protein levels in  $\text{TNF}\alpha$  (10ng/mL)-treated HUVEC treated with or without RELA  
821 siRNA. Data are normalized to respective HSP90 and then to untreated cells (n=8).

822 (g) Schematic of protocol to isolate mouse lung endothelial cells and quantify ALOD4 binding by  
823 flow cytometry.

824 (h) Representative histogram of ALOD4 binding in Cd31+ lung endothelial cells in mice treated  
825 with or without LPS (15mg/kg) for 6 hr.

826 (i) Quantification of ALOD4 binding across 2 flow cytometry experiments in mice treated with or  
827 without LPS (15mg/kg). Binding was quantified as AlexaFluor647 mean fluorescent intensity  
828 per cell (100,000 events/replicate). Data are normalized to nontreated mice (-LPS, n=6;  
829 +LPS, n=6).

830 \*p<0.05; \*\*p<0.01; \*\*\*p<0.001; \*\*\*\*p<0.0001 by one-way ANOVA with Tukey's multiple  
831 comparison's test (a and d) or Dunnett's multiple comparisons test (e), unpaired t-test (c and i),  
832 or two-way ANOVA with Sidak's multiple comparisons test (f).

833 **Figure 6. STARD10 is necessary for complete TNF $\alpha$ -mediated accessible cholesterol**  
834 **reduction and SREBP2 activation**

- 835 (a) Heatmap of genes that regulate lipid homeostasis, significantly increased with TNF $\alpha$   
836 (10ng/mL) treatment after 4 or 10 hr, and were significantly inhibited by RELA knockdown.  
837 (b) Normalized counts of *STARD10* expression from previous RNA-seq experiment.  
838 (c) *STARD10* gene locus from P65 ChIP-seq analysis of human aortic endothelial cells (HAEC)  
839 treated with TNF $\alpha$  (10ng/mL) or IL1 $\beta$  (2ng/mL) for 4 hr. Data originated from GSE89970.  
840 (d) qRT-PCR analysis of RNA from HUVEC treated with TNF $\alpha$  (10ng/mL) and two independent  
841 siRNA targeting *STARD10* (#1, #2). Data are normalized to respective *GAPDH* and then to  
842 untreated cells (n=5).  
843 (e) Immunoblot of ALOD4, SREBP2, and LDLR protein levels in HUVEC treated with *STARD10*  
844 siRNA (siS10) and with or without TNF $\alpha$  (10ng/mL). Data are normalized to respective  
845 HSP90 levels and then to untreated cells (n=3).

846 \*p<0.05; \*\*p<0.01; \*\*\*p<0.001; \*\*\*\*p<0.0001 by two-way ANOVA with Sidak's multiple  
847 comparisons test (d and e)

848 **Figure 7. Working model of the relationship between sterol sensing and EC acute**  
849 **inflammatory response**

850 Pro-inflammatory cytokines, such as TNF $\alpha$  and IL1 $\beta$ , promote NF- $\kappa$ B activation of gene  
851 transcription in endothelial cells. NF- $\kappa$ B upregulates factors, such as *STARD10*, that  
852 significantly decrease accessible cholesterol on the plasma membrane. SCAP senses the  
853 reduction in accessible cholesterol and shuttles SREBP2 to the Golgi to initiate classical  
854 proteolytic processing. Active N-SREBP2 translocates to the nucleus to transcriptionally  
855 upregulate canonical cholesterol biosynthetic genes.

856 **Supplemental Figure Legend**

857 **Figure 1 – Figure Supplement 1**

- 858 (a) Ingenuity pathway analysis for pathways and upstream transcription regulators using  
859 differentially expressed genes (upregulated) in HUVEC after 4 hr TNF $\alpha$  treatment (F.C.>1.5;  
860 p<0.05)  
861 (b) Metacore metabolic network analysis using upregulated genes from (Fig. 1a) (p<0.005).  
862 (c) GSEA hallmark analysis using upregulated genes from (Fig. 1a).  
863 (d) Ingenuity pathway analysis of gene set overlap between significantly upregulated genes in  
864 10 hr TNF $\alpha$  compared to 0 hr TNF $\alpha$  and significantly downregulated genes after 10hr TNF $\alpha$   
865 and in siRELA compared to siCTRL.

866 **Figure 2 – Figure Supplement 1**

- 867 (a) Representative SREBP2 immunoblot from whole-cell lysates from HUVEC treated with  
868  $TNF\alpha$  (16 hr) at indicated dose. Cells were incubated with fetal bovine serum (FBS) or  
869 lipoprotein depleted serum (LPDS).  
870 (b) Heatmap of classical SREBP1-dependent fatty acid synthesis genes from previous RNA-seq  
871 analysis.  
872 (c) Representative HMGCR immunoblot of HUVEC treated with  $TNF\alpha$  (10ng/mL) for indicated  
873 time and media.

874 **Figure 4 – Figure Supplement 1**

- 875 (a) SREBP2 and LDLR protein levels in HUVEC treated with  $TNF\alpha$  (10ng/mL) and with or  
876 without low density lipoprotein (LDL) (250 $\mu$ g/mL). Data are normalized to respective HSP90  
877 and then to untreated cells (n=4).  
878 (b) Representative immunoblot of SREBP2 and LDLR protein levels in HUVEC treated with  
879  $TNF\alpha$  (10ng/mL) and increasing concentrations of fatostatin.  
880 (c) SREBP2 and LDLR protein levels in HUVEC treated with  $TNF\alpha$  (10ng/mL) and with or  
881 without 25-hydroxycholesterol (25HC) (10 $\mu$ M). Data are normalized to respective HSP90  
882 and then to untreated cells (n=4).  
883 (d) SREBP2 and LDLR protein levels in HUVEC treated with  $TNF\alpha$  (10ng/mL) and with or  
884 without PF-429242 (10 $\mu$ M). Data are normalized to respective HSP90 and then to untreated  
885 cells (n=4).  
886 (e) Quantification of SREBP2 and LDLR protein levels in HUVEC treated with  $TNF\alpha$  (10ng/mL)  
887 and with or without M $\beta$ CD-cholesterol (Chol) (65 $\mu$ M). Data are normalized to respective  
888 HSP90 and then to untreated cells (n=3).  
889 (f) Quantification of SREBP2 protein levels in HUVEC treated with  $TNF\alpha$  (10ng/mL) and with or  
890 without siSCAP. Data are normalized to respective HSP90 and then to untreated cells (n=4).  
891 \*p<0.05; \*\*p<0.01; \*\*\*p<0.001; \*\*\*\*p<0.0001 by two-way ANOVA with Sidak's multiple  
892 comparisons test

893 **Figure 5 – Figure Supplement 1**

- 894 (a) Diagram of pipeline for immunoblotting protocol to quantify EC accessible cholesterol (top).  
895 Representative immunoblot of HIS (ALOD4) after treatment with cholesterol modifying  
896 agents: M $\beta$ CD-cholesterol (Chol) (25 $\mu$ g/mL), LDL (100 $\mu$ g/ml), or M $\beta$ CD (1%) (bottom).  
897 (b) Diagram of pipeline for in-cell Western blotting protocol to quantify EC accessible cholesterol  
898 (top). Representative in-cell Western blot of secondary alone ( $\alpha$ -HIS-647) or HIS (ALOD4)

- 899 after treatment with cholesterol modifying agents: M $\beta$ CD-cholesterol (Chol) (25 $\mu$ g/mL), LDL  
900 (100 $\mu$ g/ml), or M $\beta$ CD (1%) (bottom).
- 901 (c) Representative SDS-PAGE gel of purified unconjugated ALOD4 and fluorescent ALOD4-  
902 647 stained with Coomassie (left) or recorded with the 700nm channel on LICOR  
903 Biosciences Odyssey CLx platform.
- 904 (d) Schematic of flow cytometry pipeline to quantify ALOD4 binding in cultured ECs with  
905 ALOD4-647.
- 906 (e) Flow cytometry analysis of bound ALOD4-647 per HUVEC after treatment with positive  
907 controls, lipoprotein depleted serum (LPDS), fetal bovine serum (FBS), LDL (100 $\mu$ g/mL),  
908 M $\beta$ CD-cholesterol (Chol) (25 $\mu$ g/mL), or M $\beta$ CD (1%). ALOD4 binding was quantified by  
909 mean fluorescence intensity of AlexaFluor647 channel (10,000 events/replicate, n=3).
- 910 (f) Flow cytometry analysis of ALOD4-647 bound to HUVEC treated with TNF $\alpha$  (10ng/mL) for  
911 16 hr. ALOD4 binding was quantified by mean fluorescence intensity of AlexaFluor647  
912 channel (10,000 events/replicate, n=3).
- 913 (g) Circulating TNF $\alpha$  from serum of mice treated with LPS (15mg/kg) for 2 or 6 hr (n=6).
- 914 (h) Total cholesterol from serum of mice used in (Fig 5g) (n=6).
- 915 \*p<0.05; \*\*p<0.01; \*\*\*p<0.001; \*\*\*\*p<0.0001 by unpaired t-test (f and g) or one-way ANOVA with  
916 Tukey's multiple comparison's test.

### 917 **Figure 6 – Figure Supplement 1**

- 918 (a) Schematic of possible mechanisms to deplete plasma membrane accessible cholesterol: (1)  
919 efflux, (2) sphingomyelin shielding, (3) esterification, and (4) lysosomal/endosomal  
920 accumulation.
- 921 (b) Total sphingomyelin (SM) and cholesteryl ester (CE) content in HUVEC after 4 or 10 hr of  
922 TNF $\alpha$  (10ng/mL) quantified by mass spectrometry (n=3).
- 923 (c) Thin layer chromatography of 3H-cholesterol isolated from HUVEC treated with oleic acid  
924 (OA) (0.5mM), Sandoz 58-035 (ACATi) (1 $\mu$ M), or TNF $\alpha$  (10ng/mL) for 16hr. Esterification  
925 was quantified as a ratio between cholesteryl ester (CE) and free cholesterol (FC) (n=4).
- 926 (d) Representative immunoblot of OlyA, ALOD4, SREBP2, and LDLR protein levels in HUVEC  
927 treated with TNF $\alpha$  (10ng/mL) and sphingomyelinase (SMase) (100mU/mL).
- 928 (e) Schematic of protocol for measurement of cholesterol efflux (top). 3H-cholesterol efflux in  
929 HUVEC treated with T0901317 (T090) (5 $\mu$ M) or TNF $\alpha$  (10ng/mL) and with indicated  
930 acceptors, BSA, HDL, lipoprotein depleted serum (LPDS), or fetal bovine serum (FBS).  
931 Efflux was quantified as the ratio of 3H-cholesterol in the media compared to lysates (n=4).

932 (f) Immunoblot of ALOD4, SREBP2, and LDLR protein levels in HUVEC treated with U18666A  
933 (U186) (5 $\mu$ M) or chloroquine (CQ) (10 $\mu$ M) and with or without TNF $\alpha$  (10ng/mL). Data are  
934 normalized to respective HSP90 and then to untreated cells (n=3).

935 (g) Representative images of Filipin and FITC-ulex eruopaeus agglutinin I (UEAI) stained  
936 HUVEC after treatment with TNF $\alpha$  (10ng/mL) or U18666A (U186) (5 $\mu$ M). White scale bar =  
937 30  $\mu$ m.

938 \*p<0.05; \*\*p<0.01; \*\*\*p<0.001; \*\*\*\*p<0.0001 by one-way ANOVA with Tukey's multiple  
939 comparison's test (c and e)

940

#### 941 **Supplemental Files Legends**

##### 942 **Supplementary File 1. RNA-seq normalized counts and lipidomics**

943 (RNAseq) HUVEC were treated with TNF $\alpha$  for 0, 4, and 10 hr and with or without siRNA  
944 targeting *RELA*. (Lipidomics). HUVEC were treated with TNF $\alpha$  for 0, 4, and 10 hr. Data  
945 represented as molar percentage of lipid

946

##### 947 **Source Data Legends**

948 **Figure 2\_Source Data 1.** Blots corresponding to Figure 2a and 2c.

949 **Figure 2\_Source Data 2.** Raw data supporting Figure 2a, 2b, 2c, and 2d

950 **Figure 2 – Figure Supplement 1\_Source Data 1.** Blots corresponding to Figure 2 – Figure  
951 Supplement 1 a and c.

952 **Figure 3\_Source Data 1.** Blots corresponding to Figure 3a, 3b, 3c, and 3e.

953 **Figure 3\_Source Data 2.** Raw data supporting Figure 3c, 3d, and 3e.

954 **Figure 4\_Source Data 1.** Blots corresponding to Figure 4b, 4c, 4d, 4e, and 4f.

955 **Figure 4\_Source Data 2.** Raw data supporting Figure 4g and Figure 4 – Supplement 1 a, c, d,  
956 e, and f.

957 **Figure 4 – Figure Supplement 1\_Source Data 1.** Blots corresponding to Figure 4 – Figure  
958 Supplement 1 a, b, c, and d.

959 **Figure 5\_Source Data 1.** Blots corresponding to Figure 5c and 5f.

960 **Figure 5\_Source Data 2.** Raw data supporting Figure 5a, 5c, 5d, 5e, 5f, 5i and Figure 5 –  
961 Figure Supplement 1 e, f, g, and h.

962 **Figure 5 – Figure Supplement 1\_Source Data 1.** Blots corresponding to Figure 5 – Figure  
963 Supplement 1 a and c.

964 **Figure 6\_Source Data 1.** Blots corresponding to Figure 6e.

965 **Figure 6\_Source Data 2.** Raw data supporting Figure 6d and 6e and Figure 6 – Figure  
966 Supplement 1 c and e.  
967 **Figure 6 – Figure Supplement 1\_Source Data 1.** Blots corresponding to Figure 6 – Figure  
968 Supplement 1 c, d, and f.



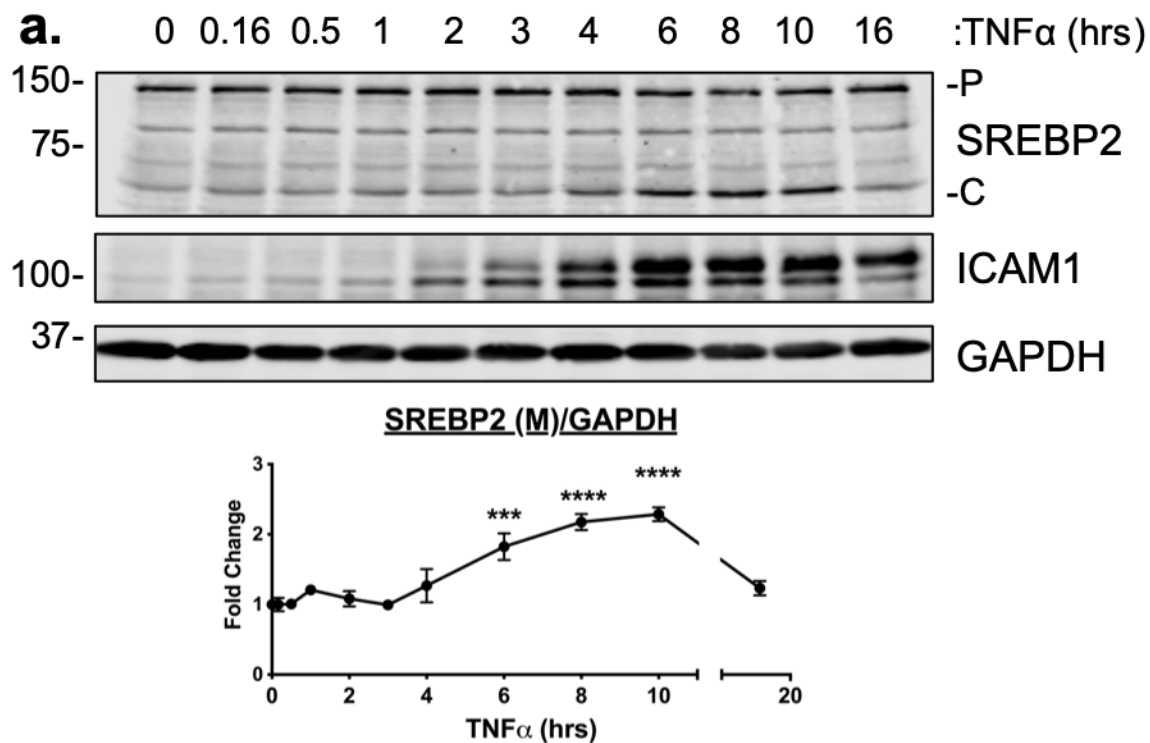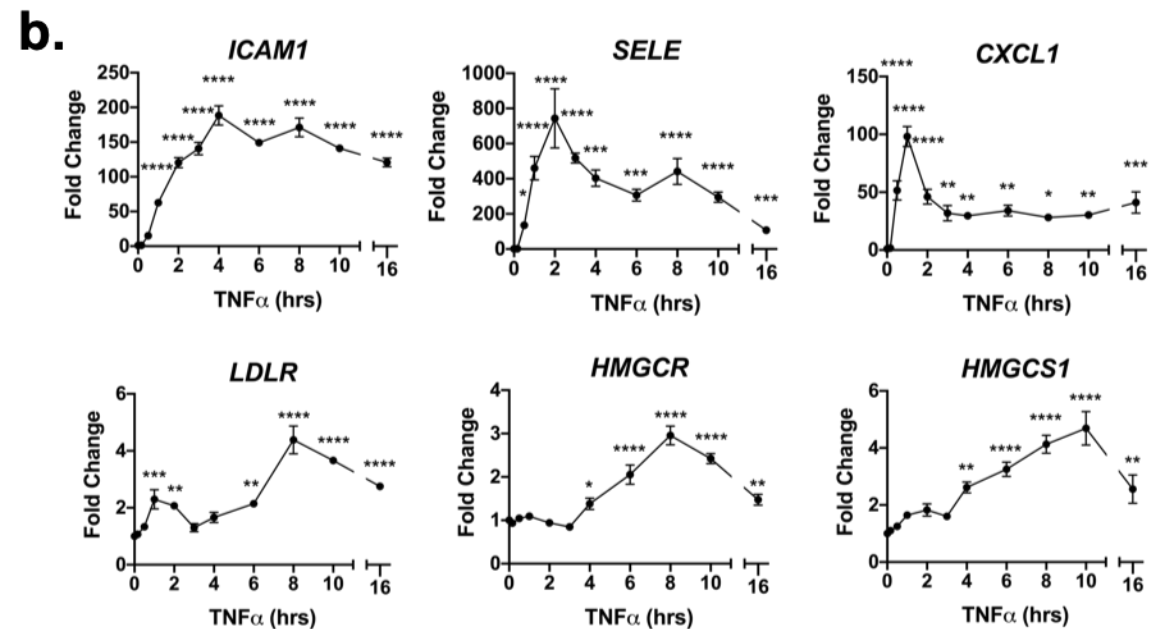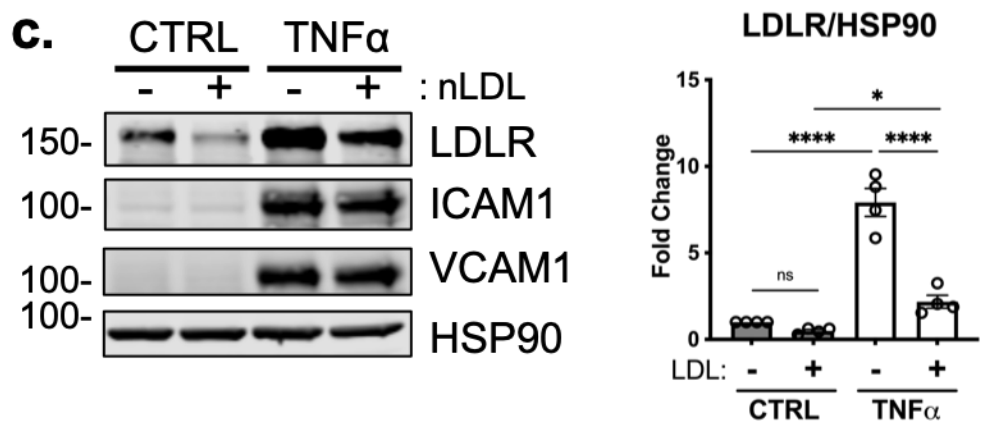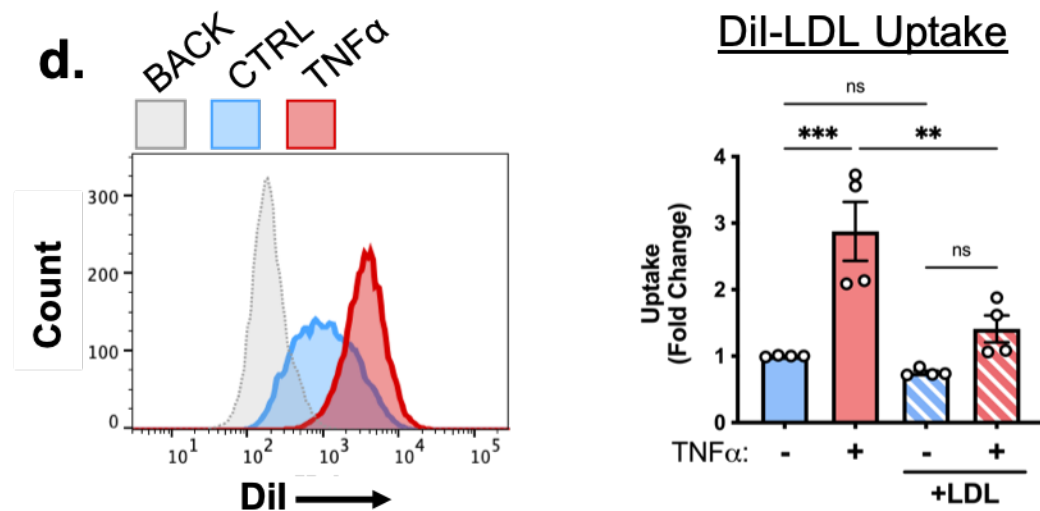



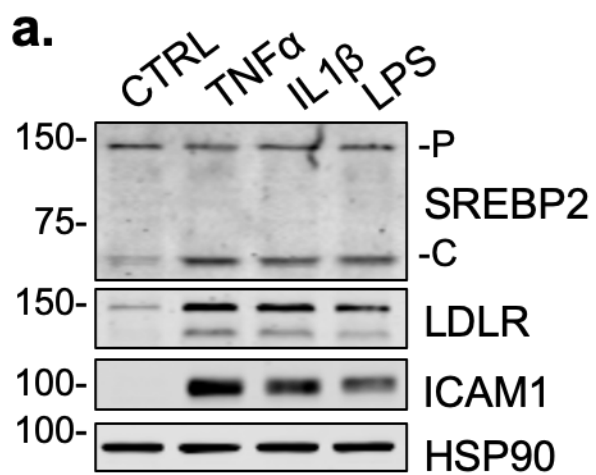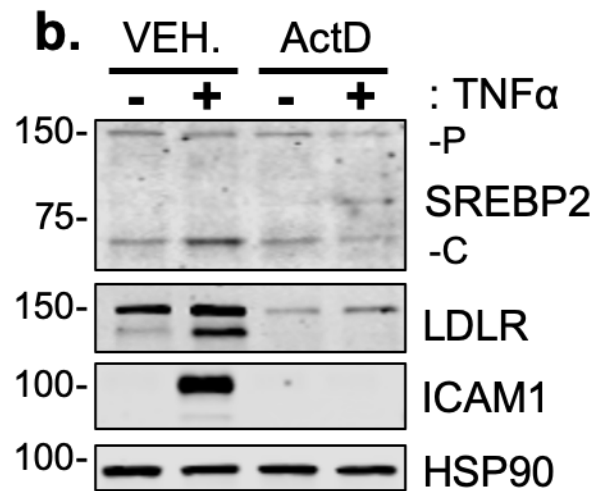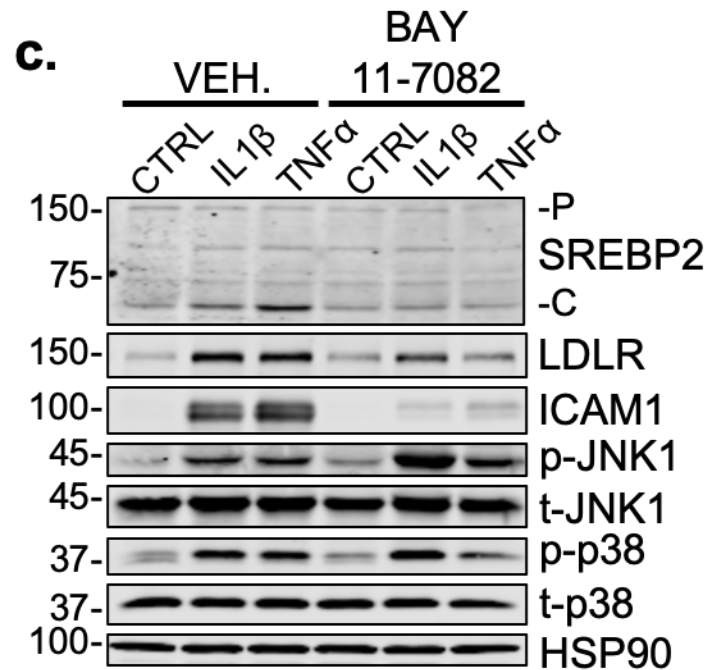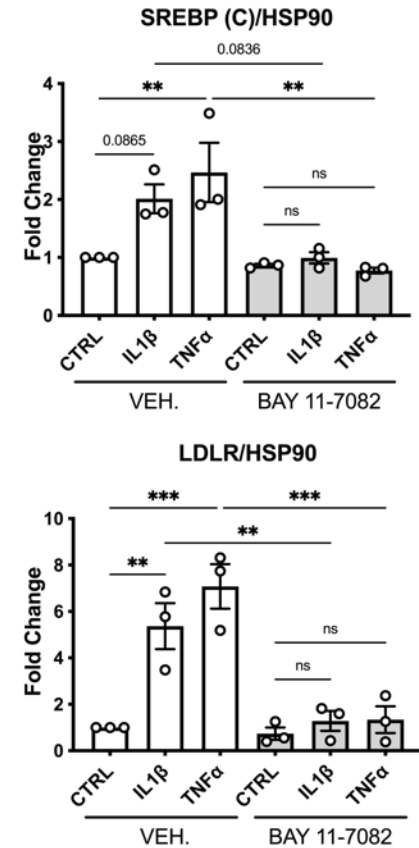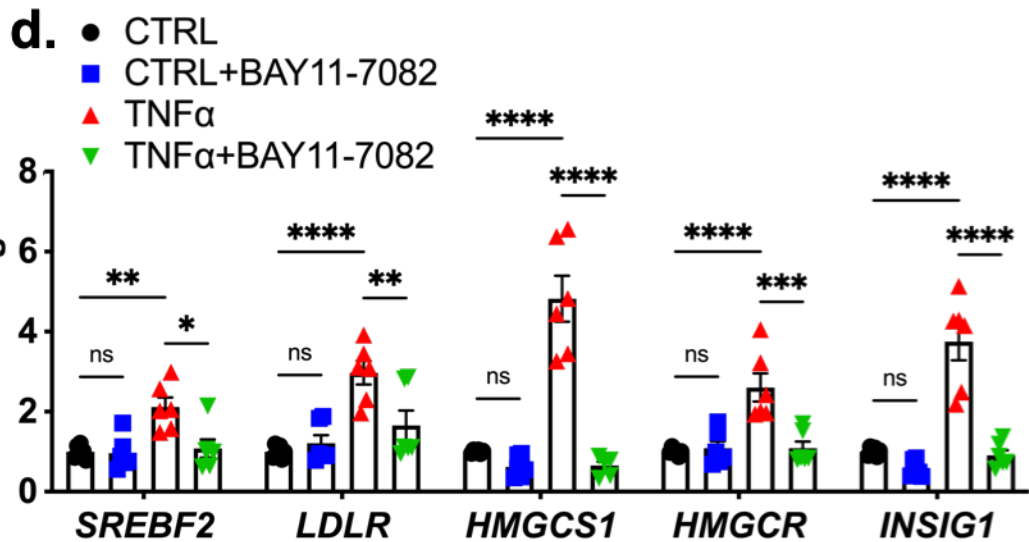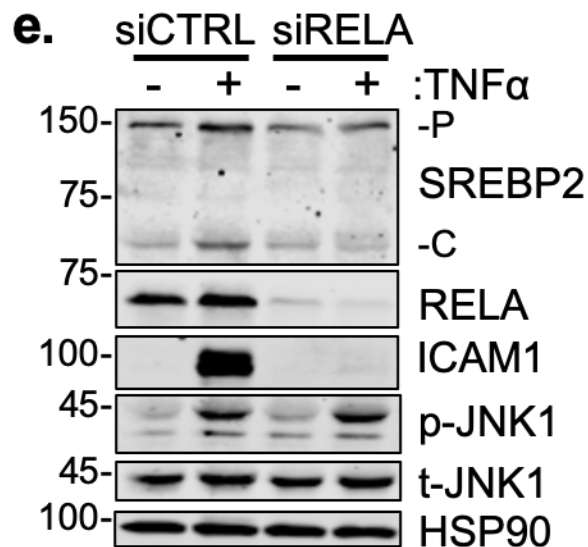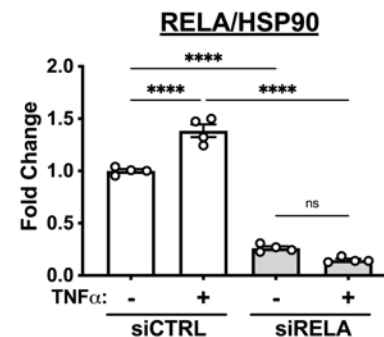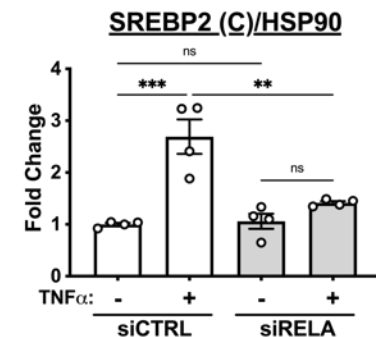

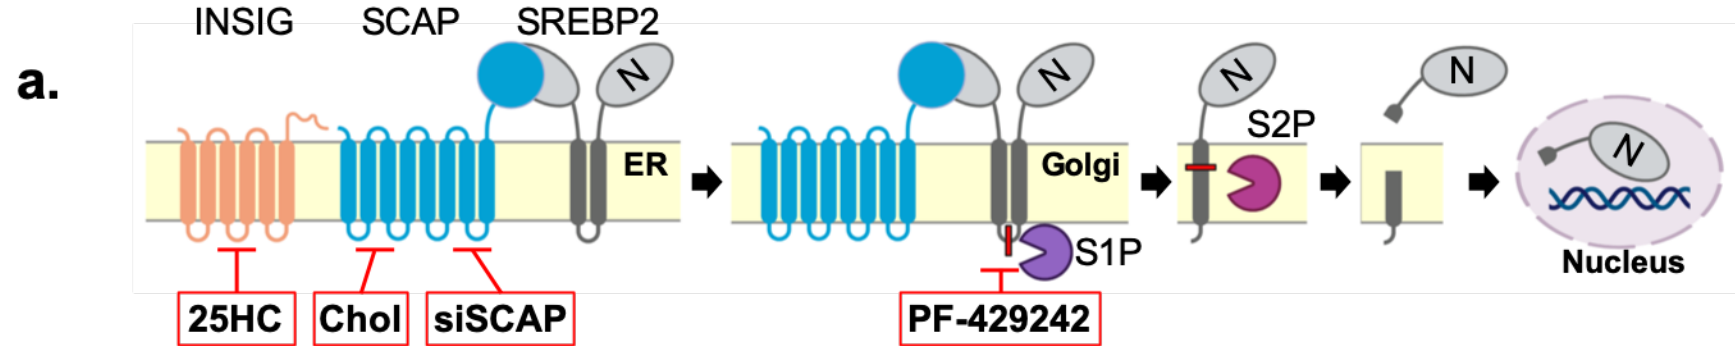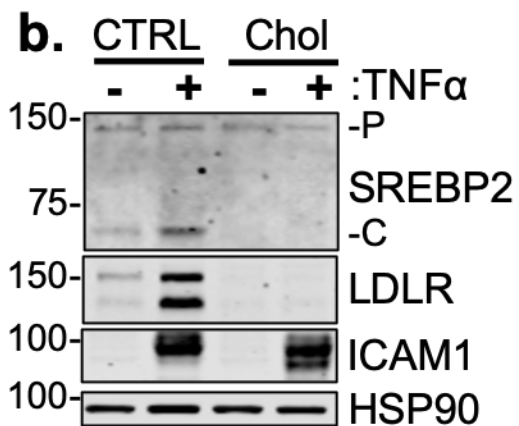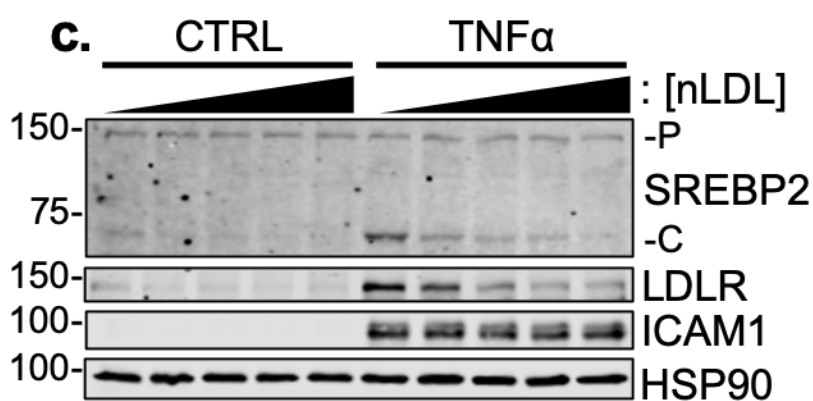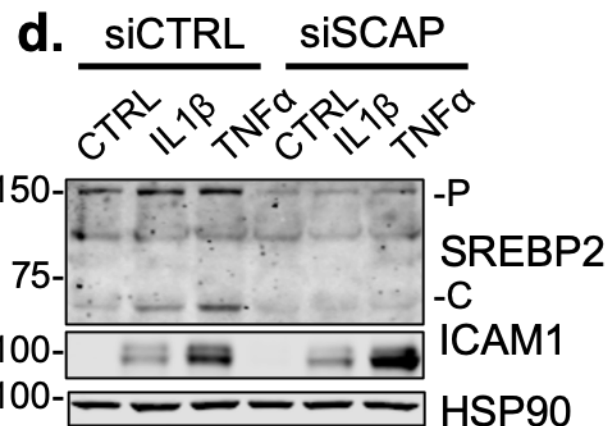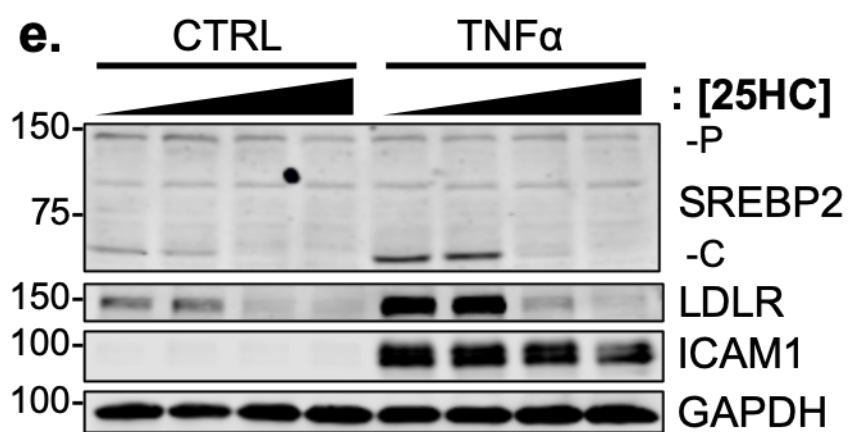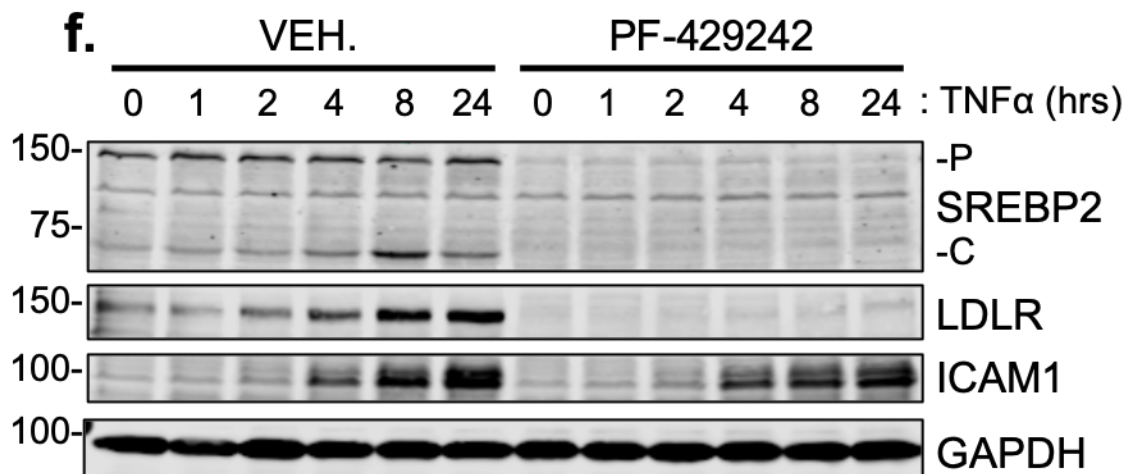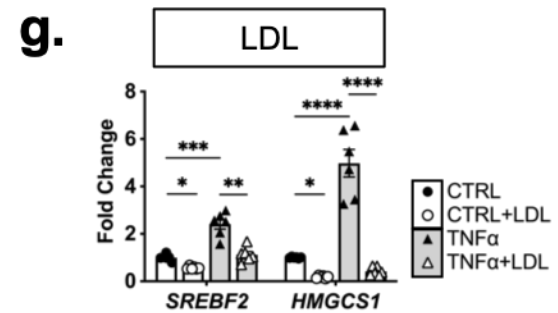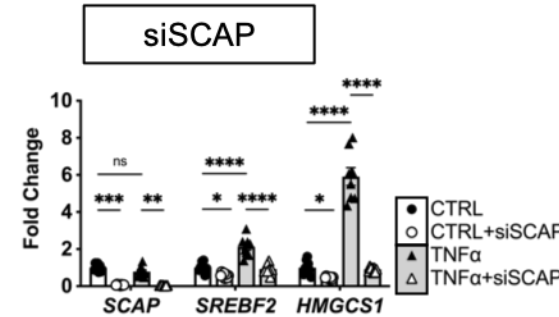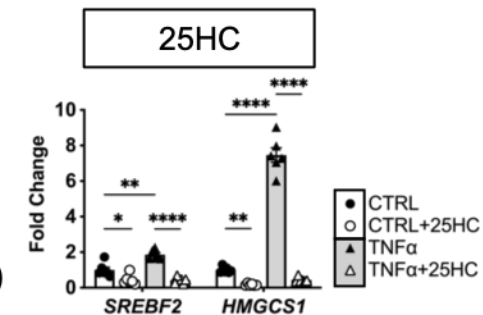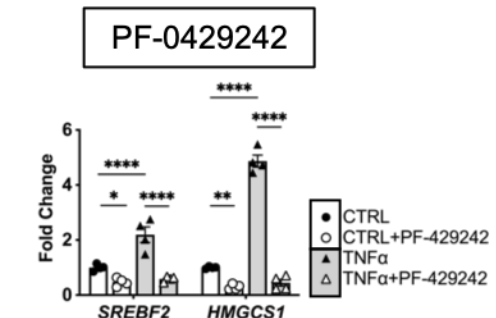

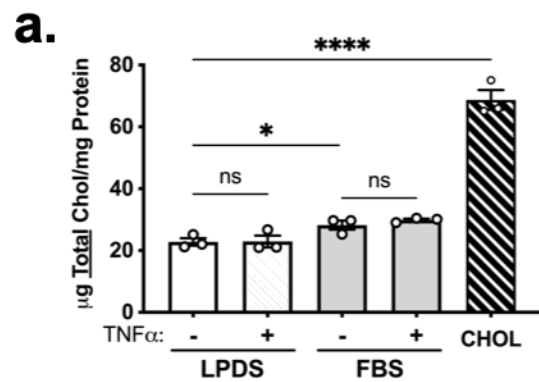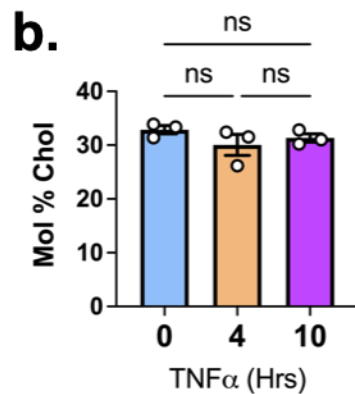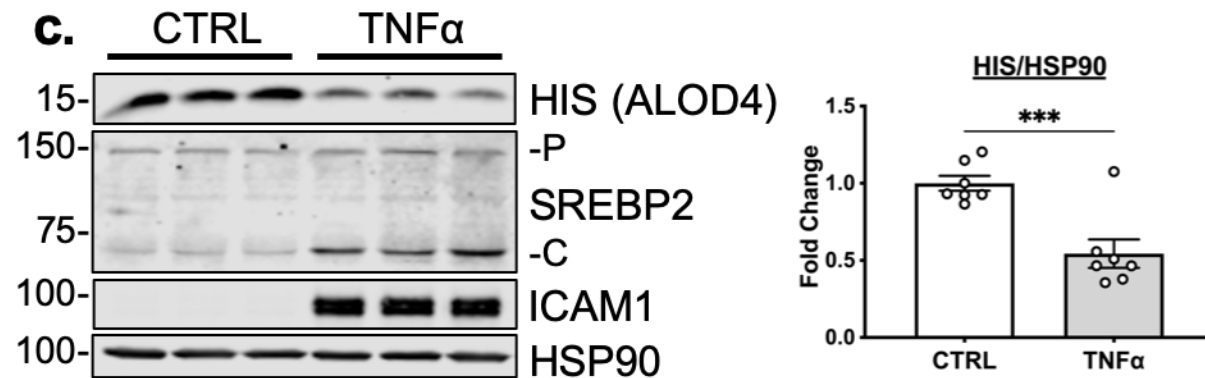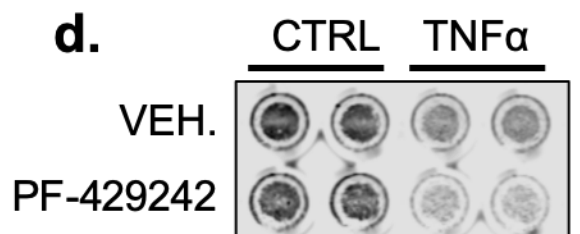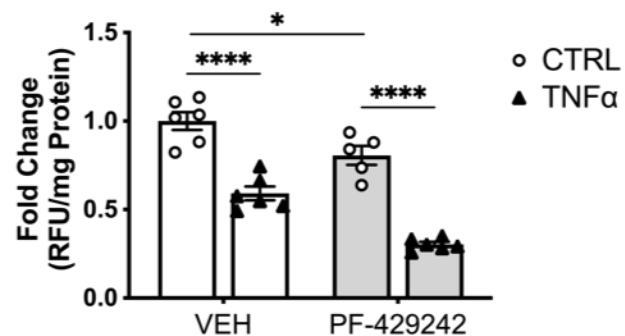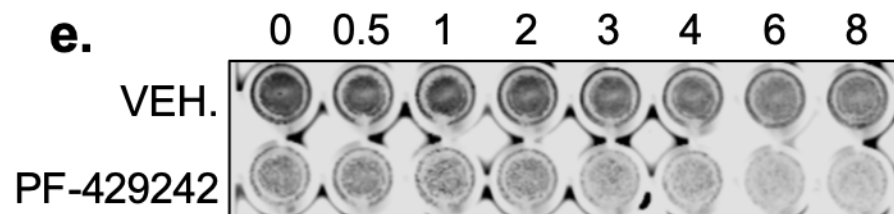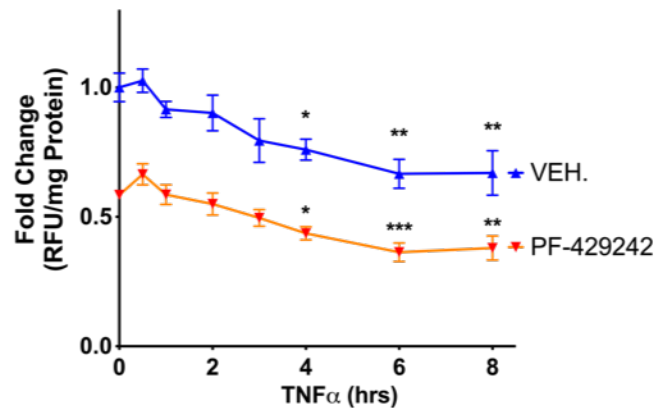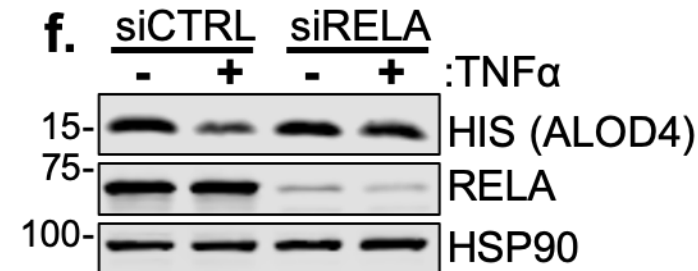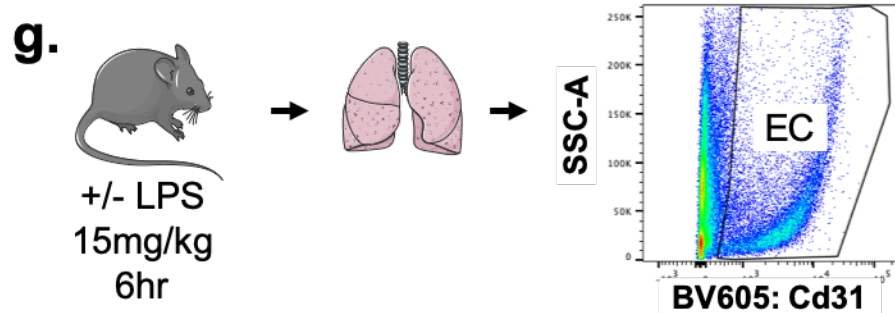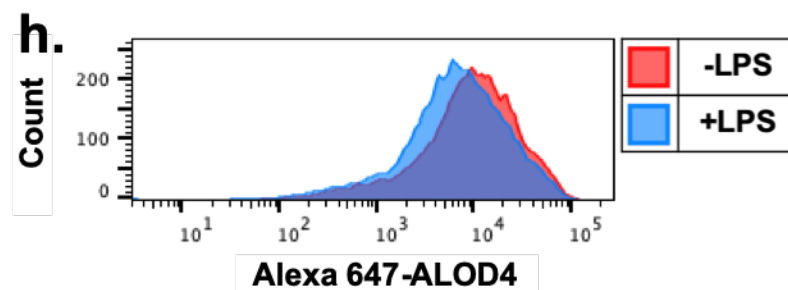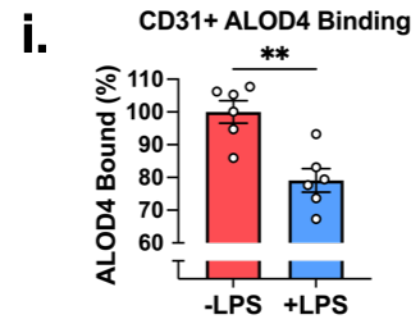

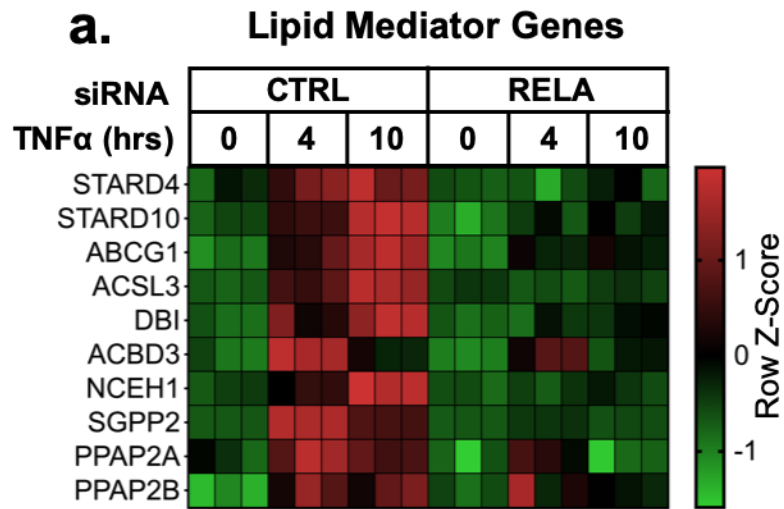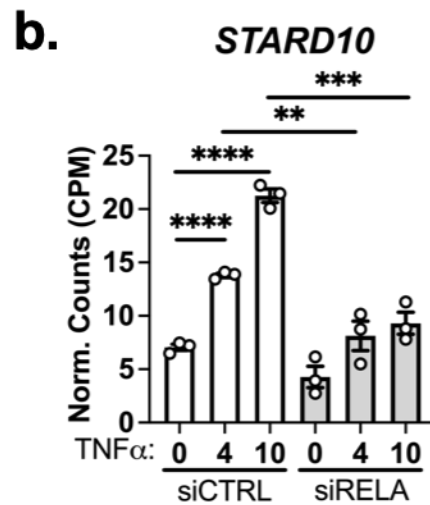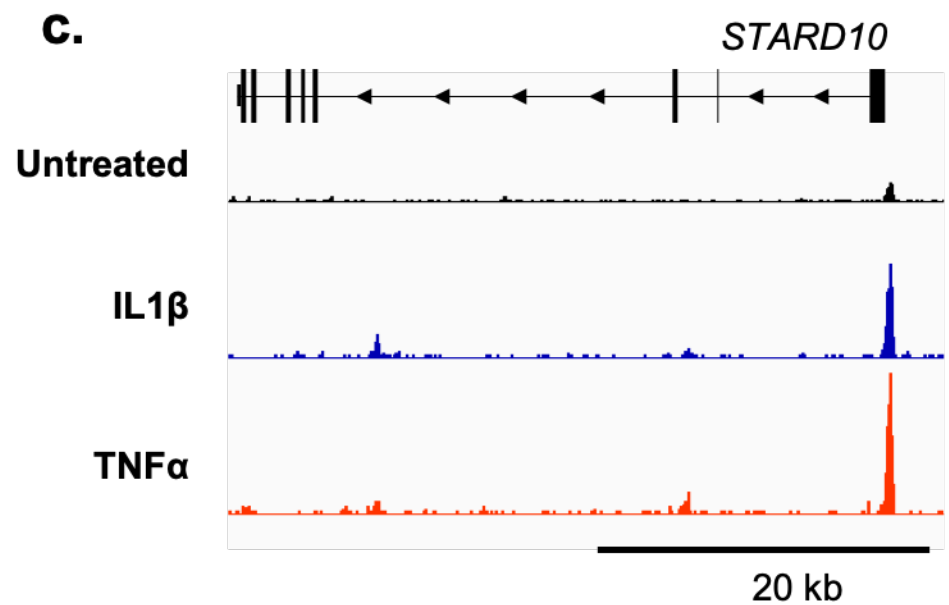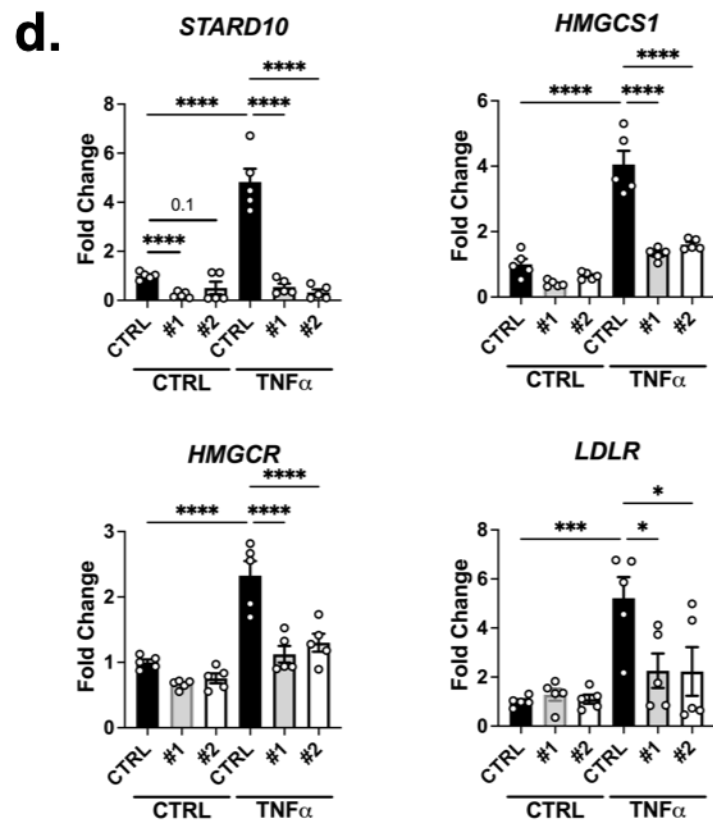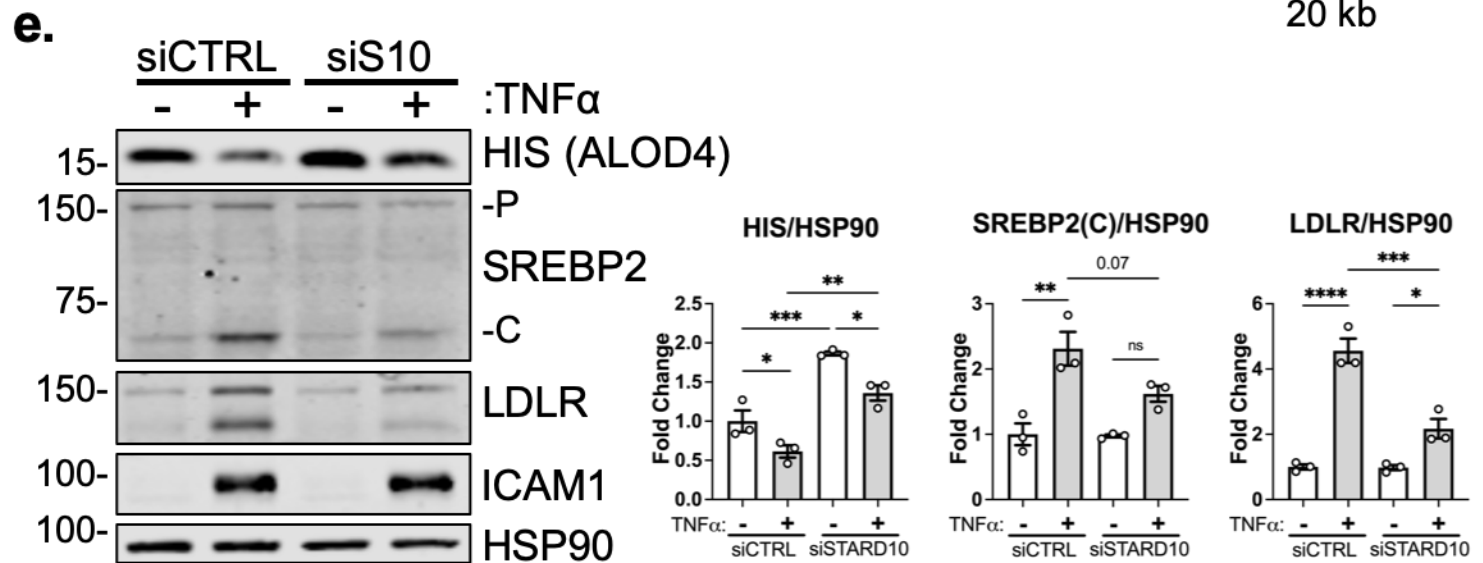

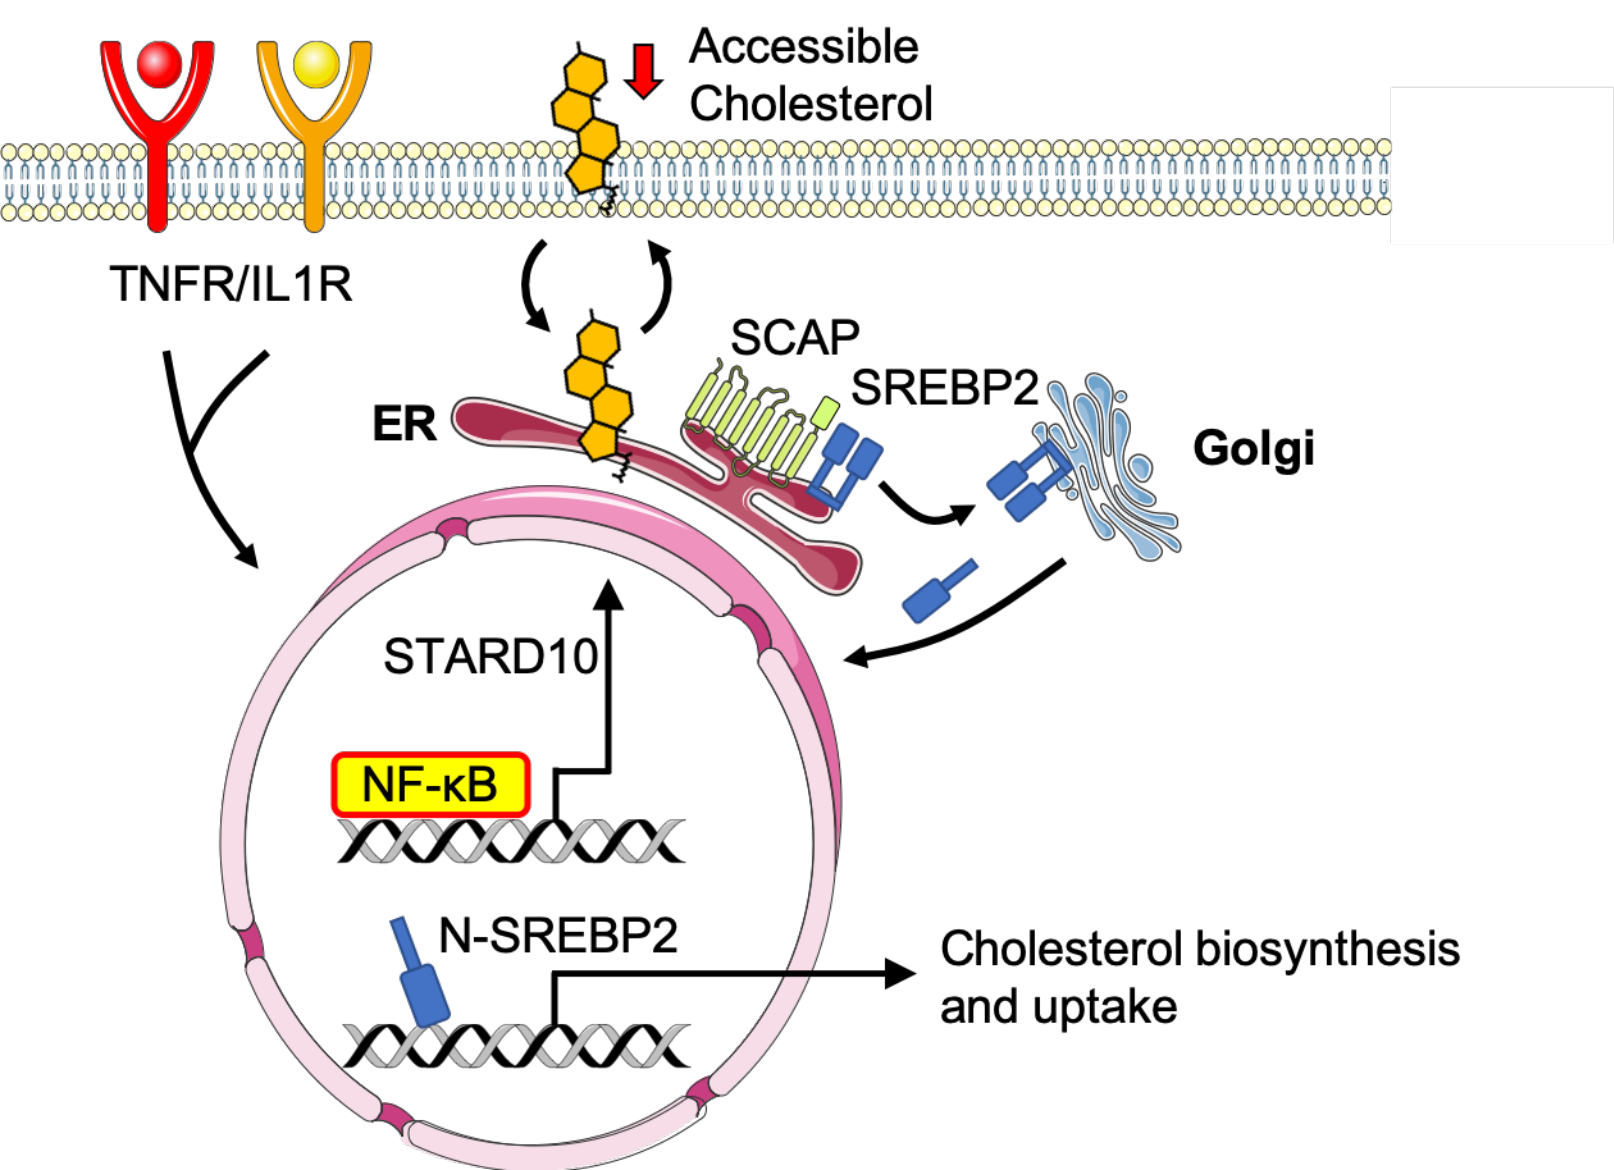

**a. IPA Analysis: 4hr TNF $\alpha$  (p<0.05 F.C.>1.5)**

**Canonical Pathways**

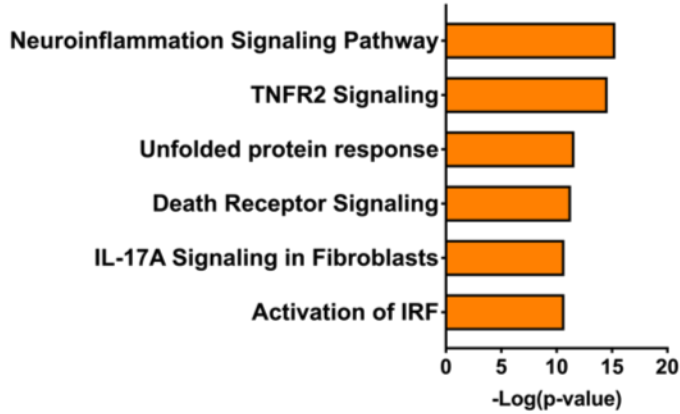

**Upstream Trxn Regulators**

| Upstream Regulator | Predicted Activation State | Activation z-score | p-value of Overlap |
|--------------------|----------------------------|--------------------|--------------------|
| RELA               | Activated                  | 7.278              | 7.02E-35           |
| ATF4               | Activated                  | 6.387              | 1.33E-28           |
| STAT1              | Activated                  | 6.336              | 1.76E-22           |
| IRF7               | Activated                  | 6.295              | 1.89E-21           |
| XBP1               | Activated                  | 5.496              | 2.28E-18           |

**b. Metacore Analysis: 10hr TNF $\alpha$ , p<0.005**

**Metabolic Networks**

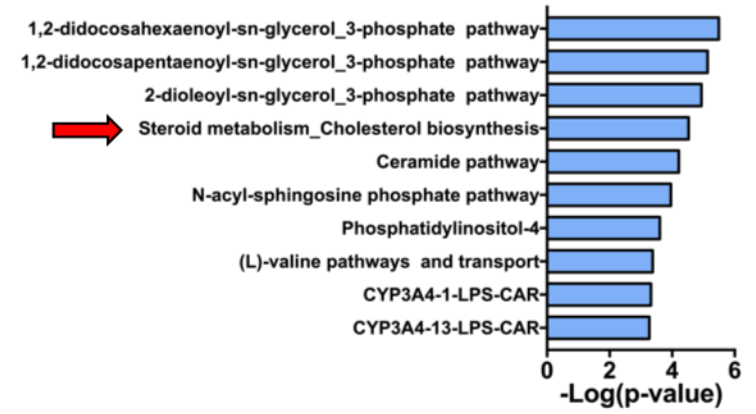

**c. GSEA Hallmark Analysis: 10hr TNF $\alpha$**

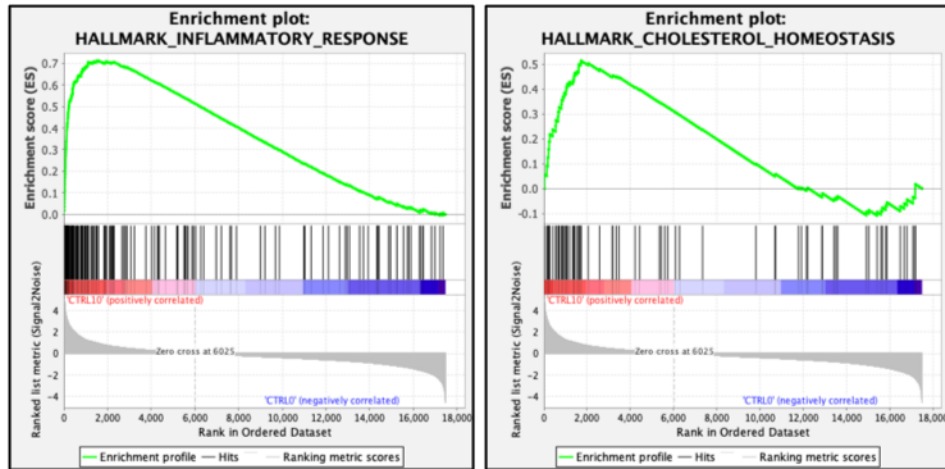

**d.**

**Upregulated**  
10hr TNF $\alpha$  vs 0hr TNF $\alpha$   
siCTRL  
p<0.05, F.C.>1.5

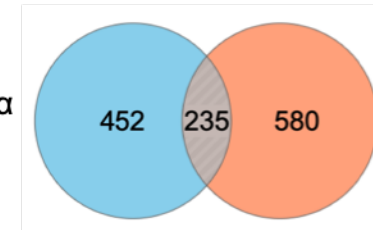

**Downregulated**  
10hr TNF $\alpha$   
siRELA vs siCTRL  
p<0.05, F.C.>1.5

**IPA Analysis: Overlap**

**Canonical Pathways**

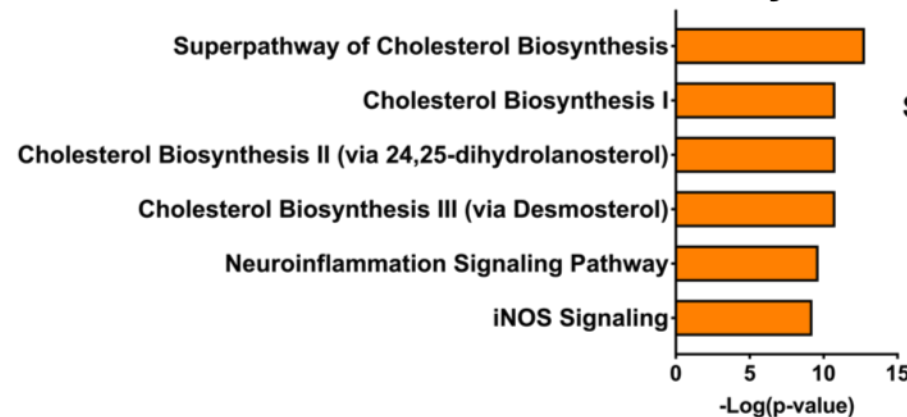

**Upstream Regulators**

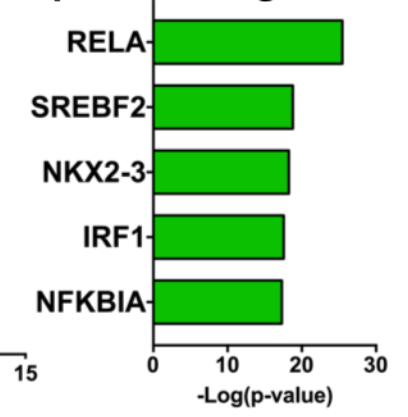

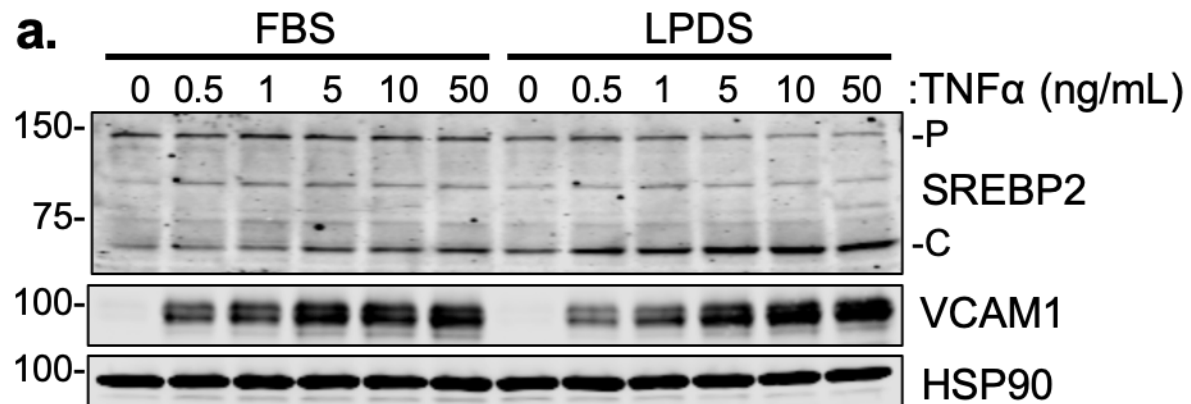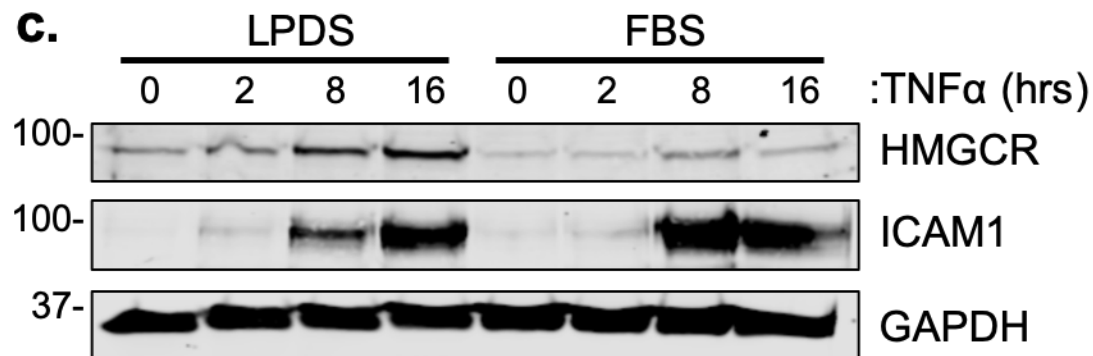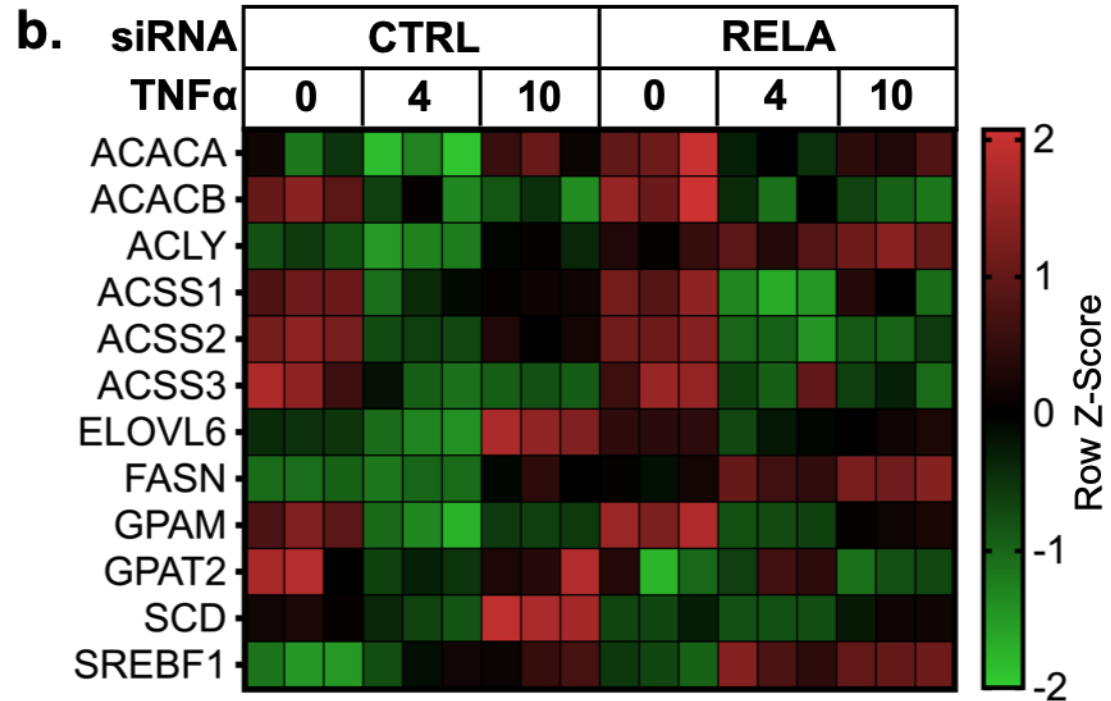

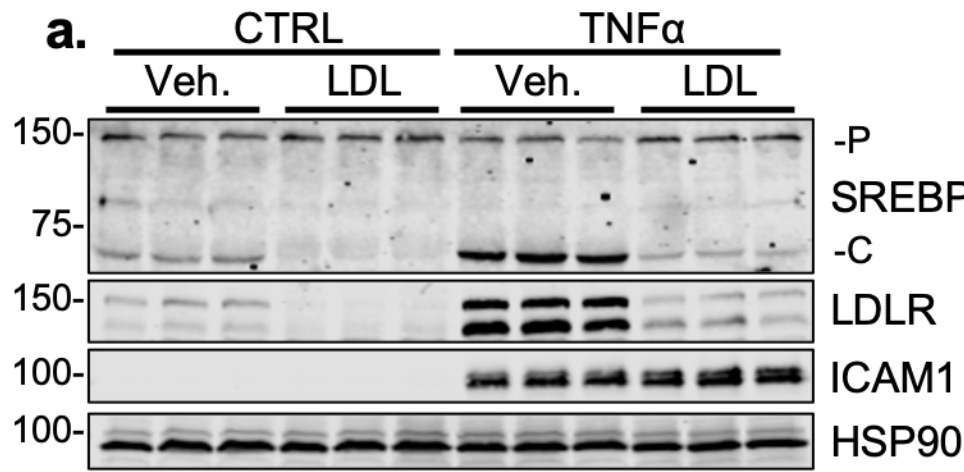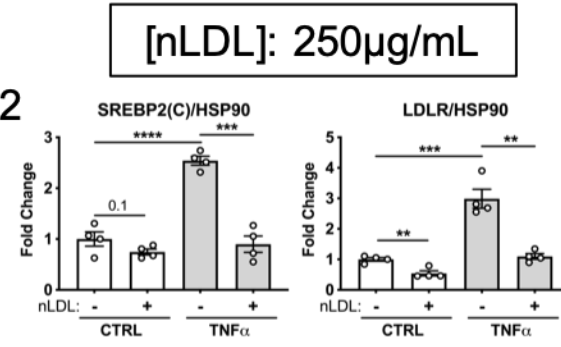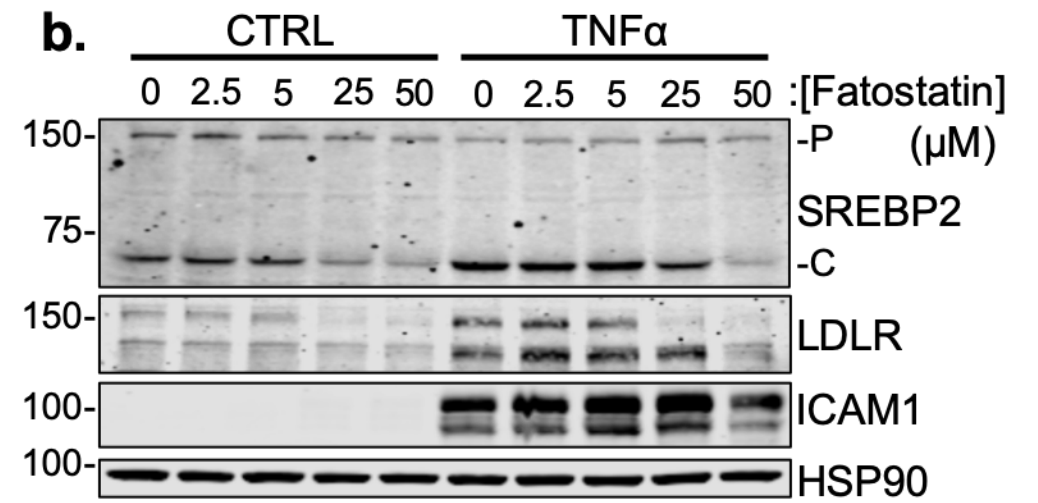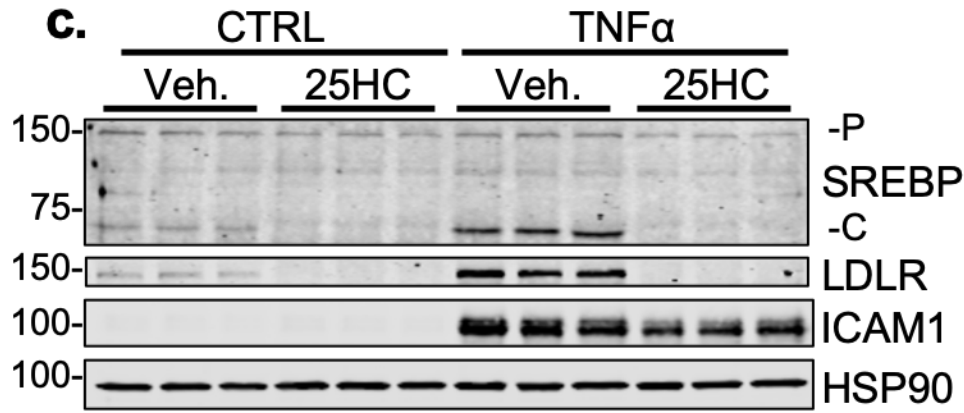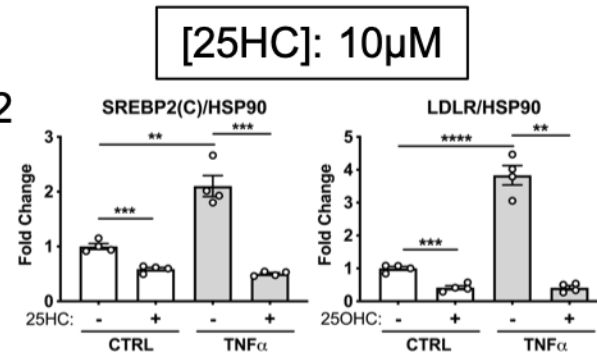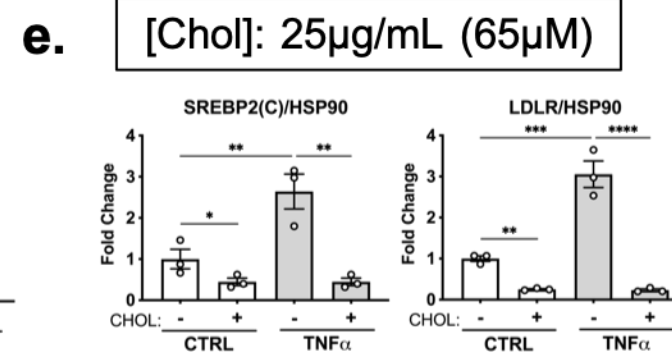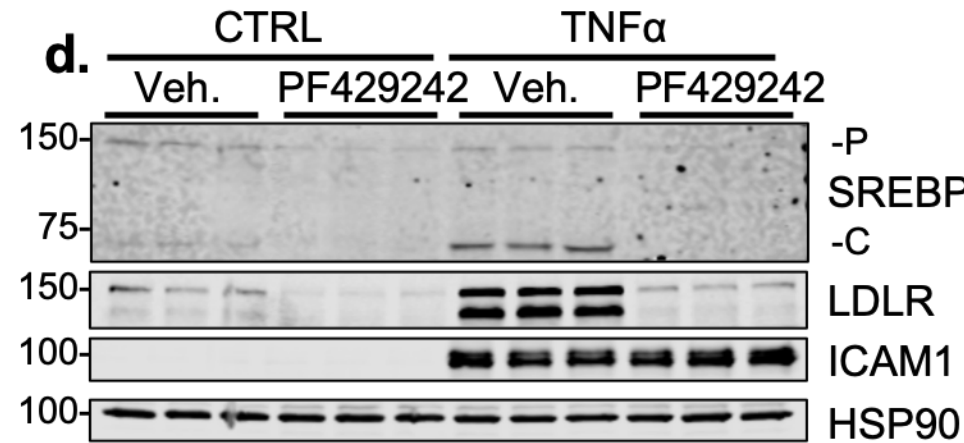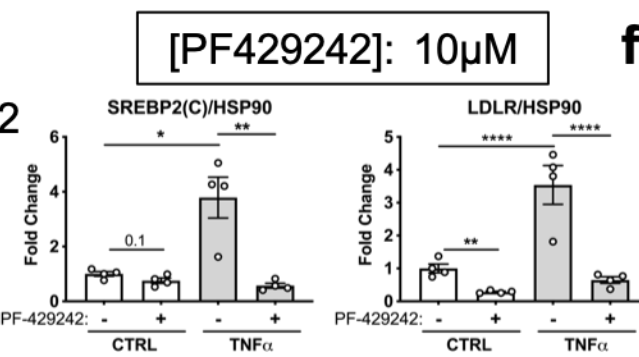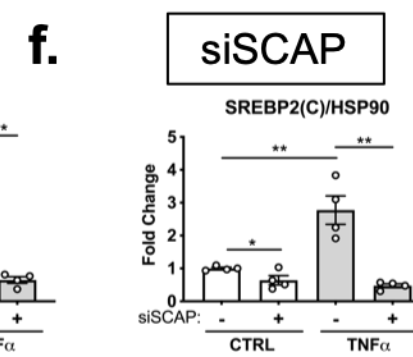



### a. Traditional Western Blot

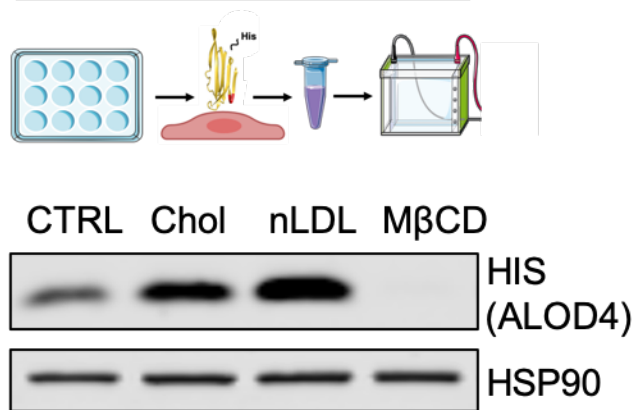

### b. In-Cell Western Blot

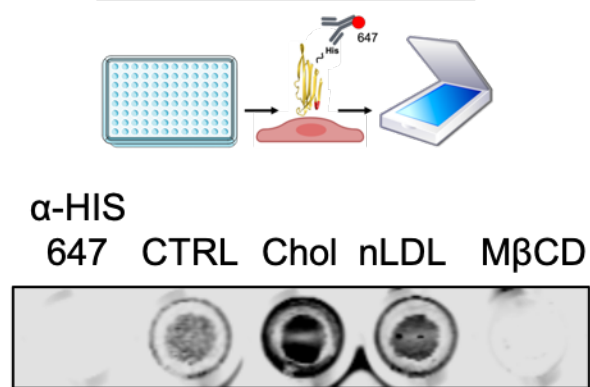

### g. TNFα

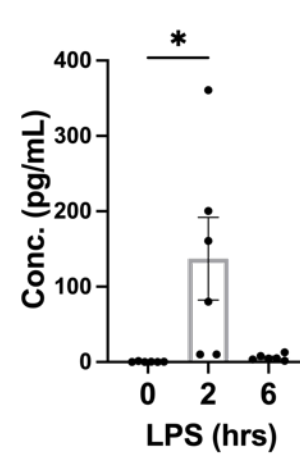

### h. Total Cholesterol

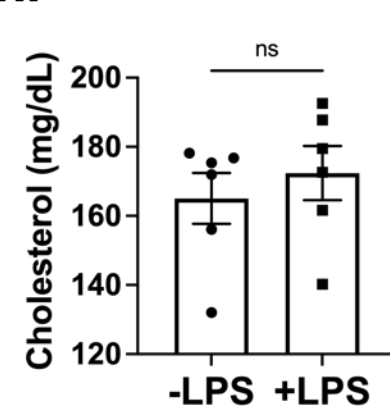

### c.

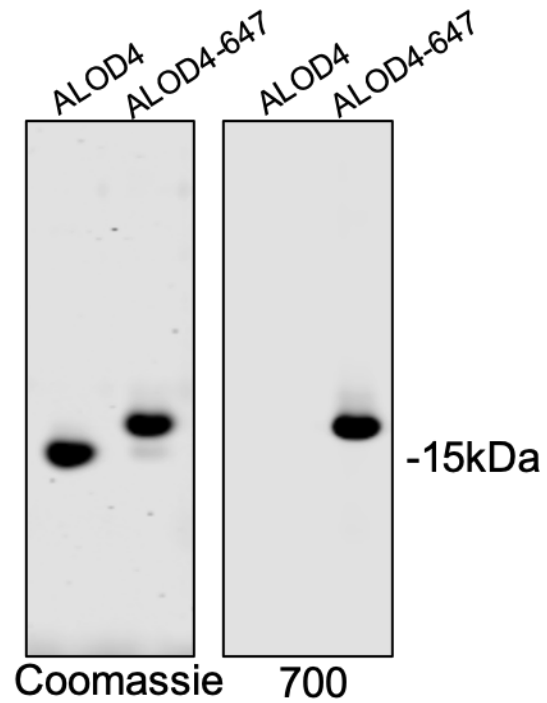

### d. Flow Cytometry

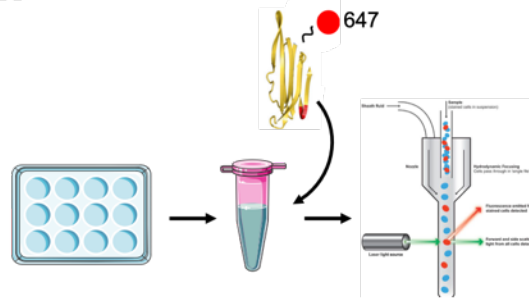

### e. ALOD4-647 Bound

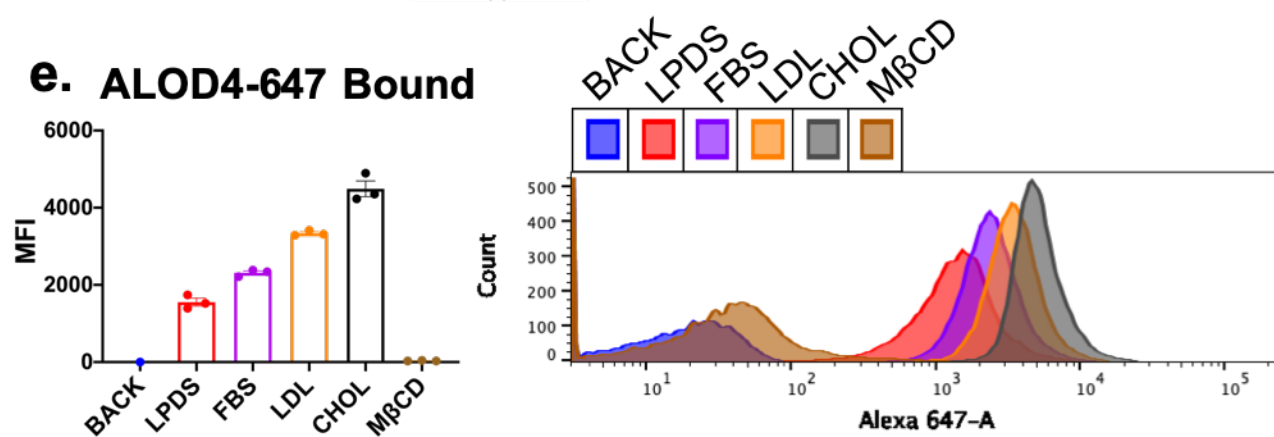

### f. ALOD4-647 Bound

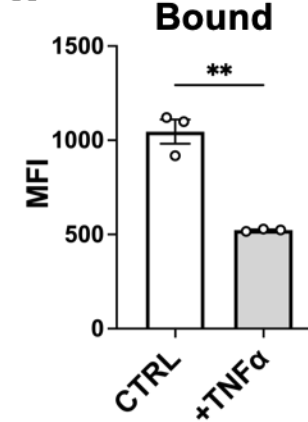

**a.**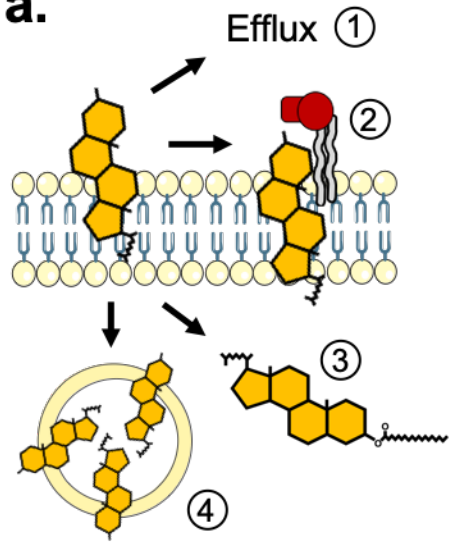**b.**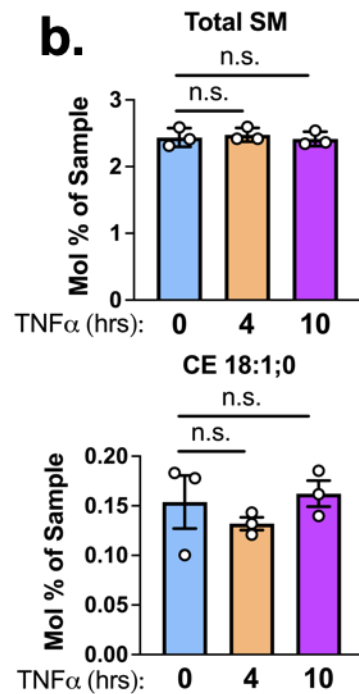**c.**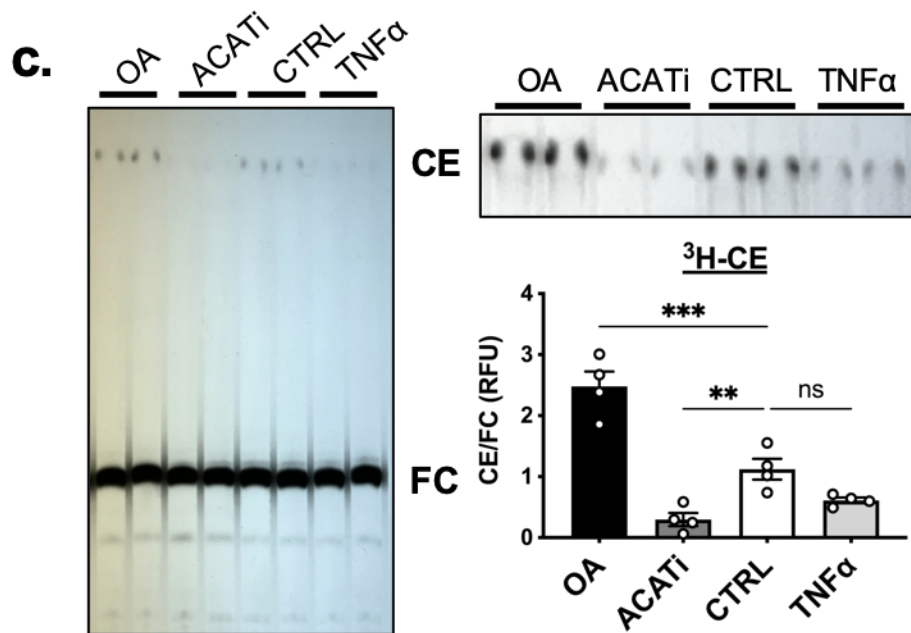**d.**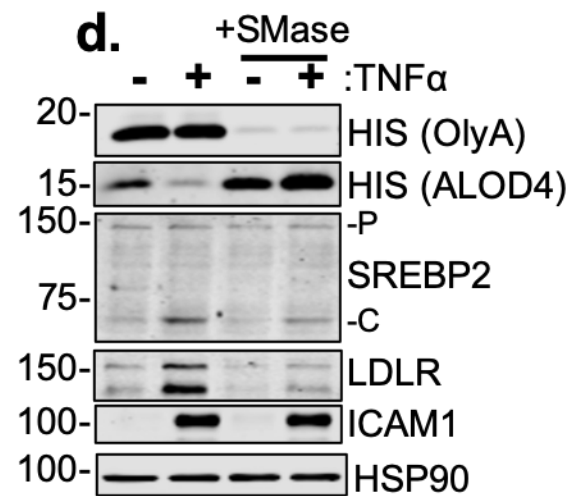**e.**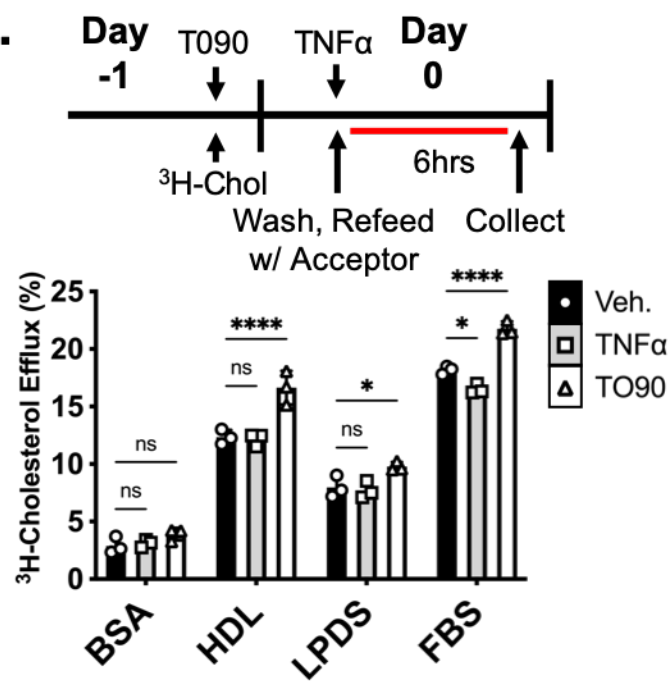**f.**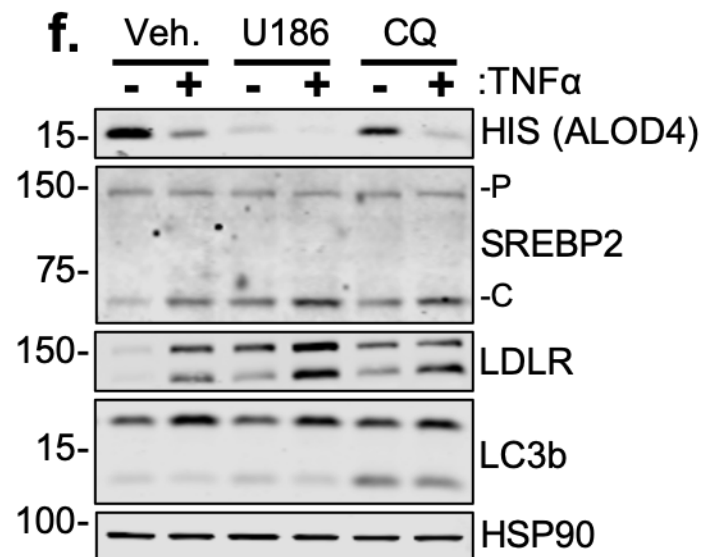**g.**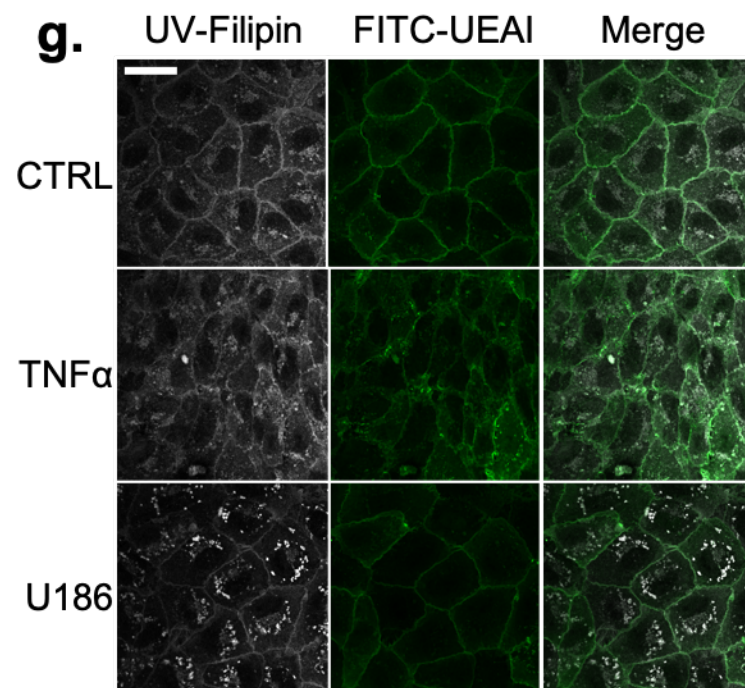

Source: https://www.biorxiv.org/content/10.1101/2022.05.05.490737v1.full.pdf
